# Supplementary material for: p24 proteins are required for secretion of Wnt ligands
Source: PubMed Central journal article supplement — EMBO Rep. 2011 Nov 18;12(12):1265–72. doi: 10.1038/embor.2011.212 (PMC3245698; doi:10.1038/embor.2011.212), 2011-11-18
Supplement: embor2011212s1.pdf [file embor2011212s1.pdf]

## **Supplementary Materials**

### **Material and Methods**

#### **Plasmid Constructs**

The pGL3-Hsp70 (dTCF-Luc) reporter was generated by inserting multimerized dTCF/pangolin binding sites (van de Wetering et al, 1997) upstream of the minimal Hsp70 promoter into pGL3-basic (Promega). Opm-V5 and Opm-3xHA were amplified from a full-length cDNA (SD08771, DGRC). The opm rescue construct was generated by introducing 295 silent mutations (GENEART AG) into the full-length opm cDNA (Schulz et al, 2009). WntD-3xHA was generated from a full length cDNA (RE57705, DGRC). TMED5 was amplified from a full-length cDNA (NM\_016040, OriGene). pAc-wgGluc was generated by replacing the GFP-coding region of Wg-GFP (Pfeiffer et al, 2002) with the Gaussia Luciferase coding region from CMV-Gluc (NEB). The cni ORF was amplified from a full-length cDNA (RE07818, DGRC). The secreted form of Luciferase (sLuc) (Katanaev et al, 2008), pAc-upd-GFP and 2x6Draf-Luciferase (Muller et al, 2005), pAc-Hh and ptc $\Delta$ 136-Luc (Silver et al, 2007) have been described previously.

#### **Immunostainings and VSGV secretion**

Wg protein stainings were performed as described in (Bartscherer et al, 2006). Antibodies used were mouse- $\alpha$ -Wg (DSHB), guineapig- $\alpha$ -Sens (gift from H.Bellen) and rabbit- $\alpha$ -dGM130 (Abcam). Extracellular Wg staining was performed as described in (Strigini &

Cohen, 2000). A Leica TCS Sp5 confocal microscope was used for microscopy analysis. Image analysis and quantification was done using ImageJ. Immunostainings on cultured cells were performed using rabbit- $\alpha$ -ERGIC53/58 (Sigma) on paraformaldehyde (PFA) fixed cells. For ERGIC53 stainings, cells were treated with 20  $\mu$ M nocodazole for 60 min and brefeldin A (BFA) for additional 30 min after a 10 min incubation on ice. For the VSVG secretion assay,  $2 \times 10^4$  Hek293T cells were seeded on polyL (Sigma) coated cover slips in 24 well plates on 50 nM siRNAs. Forty-eight hours later, VSVG-GFP (gift of K. Simons) was transfected per well and cells shifted to 40°C overnight. Cells were then treated with brefeldin A (5  $\mu$ g/mL) for one hour and cyclohexamid (10  $\mu$ g/mL) for two hours at 40°C. In order to induce VSVG-GFP secretion, cells were shifted to 32°C and MeOH fixed 15 min and 60 min after temperature shift. A LEICA TCS Sp5 confocal microscope was used for microscopy analysis. Image analysis was performed using Adobe Photoshop and ImageJ.

### **Fly strains**

RNAi lines targeting *opm* (transformant IDs # 10168, RNAi 1), *evi* (CG6210, # 103812), *rel* (CG11992, #108469), *p24-1* (CG1967, #12196, RNAi 1), *por* (CG6205, # 9149), *ChOp24* (CG3564, #7039, RNAi 1), *eca* (CG33104, #49749, RNAi 1), *p24-2* (CG33105, #5843), CG9308 (#6608) and CG31787 (#6372) were obtained from the Vienna *Drosophila* RNAi Center (VDRC). RNAi lines targeting *opm* (BKN27517, RNAi 2), *ChOP24* (BNK27384, RNAi 2), *p24-1* (BKN28359, RNAi 2), *eca* (BKN29376, RNAi 2) and *bai* (CG11785, BKN28684) were kindly generated by K.Keleman and B.Dixon.

UAS-KDEL-GFP and the CHOp24 P-element insertion line (e04526) were obtained from Bloomington. The WntD mutant is described in (Gordon et al, 2005).

### **Opm targeting by homologous recombination**

The CG9053 gene was targeted by ends-out homologous recombination as described previously. Transgenic lines containing the targeting construct were established in a  $w^{1118}$  background using standard procedures. Donor males were crossed to P{70Flp}11 P{70I-SceI}2B, *sco*/*Cyo* (Bloomington) females. Vials were heat-shocked for 60 min three days after egg-laying. *Sco* virgin F1 females with white or mosaic eyes were crossed to Fm7 males and screened for insertion on the X-chromosome. Positive recombinants were outcrossed with  $w^{1118}$  for 6 generations and balanced using the FM7 chromosome. For the generation of *opm* mutant clones, *opm*<sup>9.3</sup> was recombined on FRT18A (Bloomington). *opm*<sup>9.3</sup>FRT18A males were then crossed with *ubiGFP*, FRT18A; *hsflp* virgins. Heatshocks were performed at 38°C for 60 min two days after egg laying.

### **Supplemental Figures S1-S5, Table S1-S3**

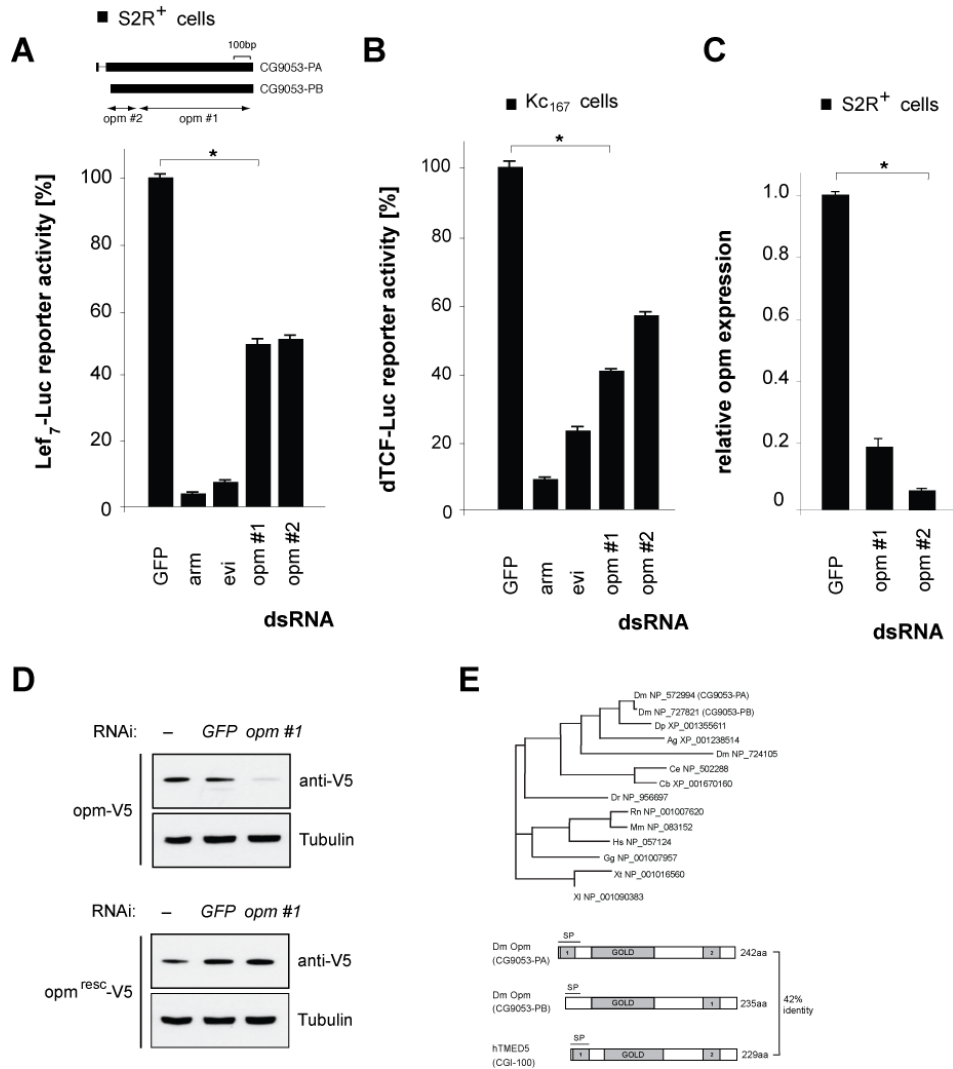

**Figure S1:** Opm is a novel modulator of Wg signaling in *Drosophila*. (A) Lef<sub>7</sub>-Luc reporter activity in S2R<sup>+</sup> cells, in presence of the indicated dsRNAs. Two independent, non-overlapping dsRNA targeting both splice variants of the *opm* ORF (opm #1, opm #2) were used to confirm the *opm* RNAi phenotype. Data are shown as mean  $\pm$  standard deviation (\* $p < 0.001$  for all phenotypes, paired Student's t-test,  $n = 4$ ). (B) dTCF-Luc activity in *Drosophila* Kc<sub>167</sub> cells, in presence of the indicated dsRNAs. Data are shown as mean  $\pm$  standard deviation (\* $p < 0.001$ , paired Student's t-test,  $n = 4$ ). (C) Relative expression of *opm* in S2R<sup>+</sup> cells normalized to control dsRNAs. Data are shown as mean  $\pm$  standard deviation (\* $p < 0.001$ , paired Student's t-test,  $n = 3$ ). (D) Western blot analysis of Kc<sub>167</sub> cells treated with the indicated dsRNA and transfected with either wild type *opm* (opm-V5) or an RNAi-insensitive *opm* rescue (opm<sup>resc</sup>-V5) construct. (E) Upper panel: phylogenetic tree of sequences of different species homologous to *Drosophila* Opm. Genbank accession numbers are indicated. Dm: *Drosophila melanogaster*; Dp: *Drosophila pseudoobscura*; Ag: *Anopheles gambiae*; Ce: *Caenorhabditis elegans*; Cb: *Caenorhabditis briggsae*; Dr: *Danio rerio*; Rn: *Rattus*

*norvegicus*; Mm: *Mus musculus*; Hs: *Homo sapiens*; Gg: *Gallus gallus*; Xt: *Xenopus tropicalis*; Xl: *Xenopus laevis*. Lower panel: predicted protein domain architecture of both *Drosophila* Opm splice variants (CG9053-PA and CG9053-PB). Both splice variants contain the conserved GOLD domain (Golgi dynamics, IPR009038) and a C-terminal transmembrane domain. The first transmembrane domain overlaps with a predicted signal peptide. Sequence identity with the human homolog (TMED5, NP\_057124) is indicated.

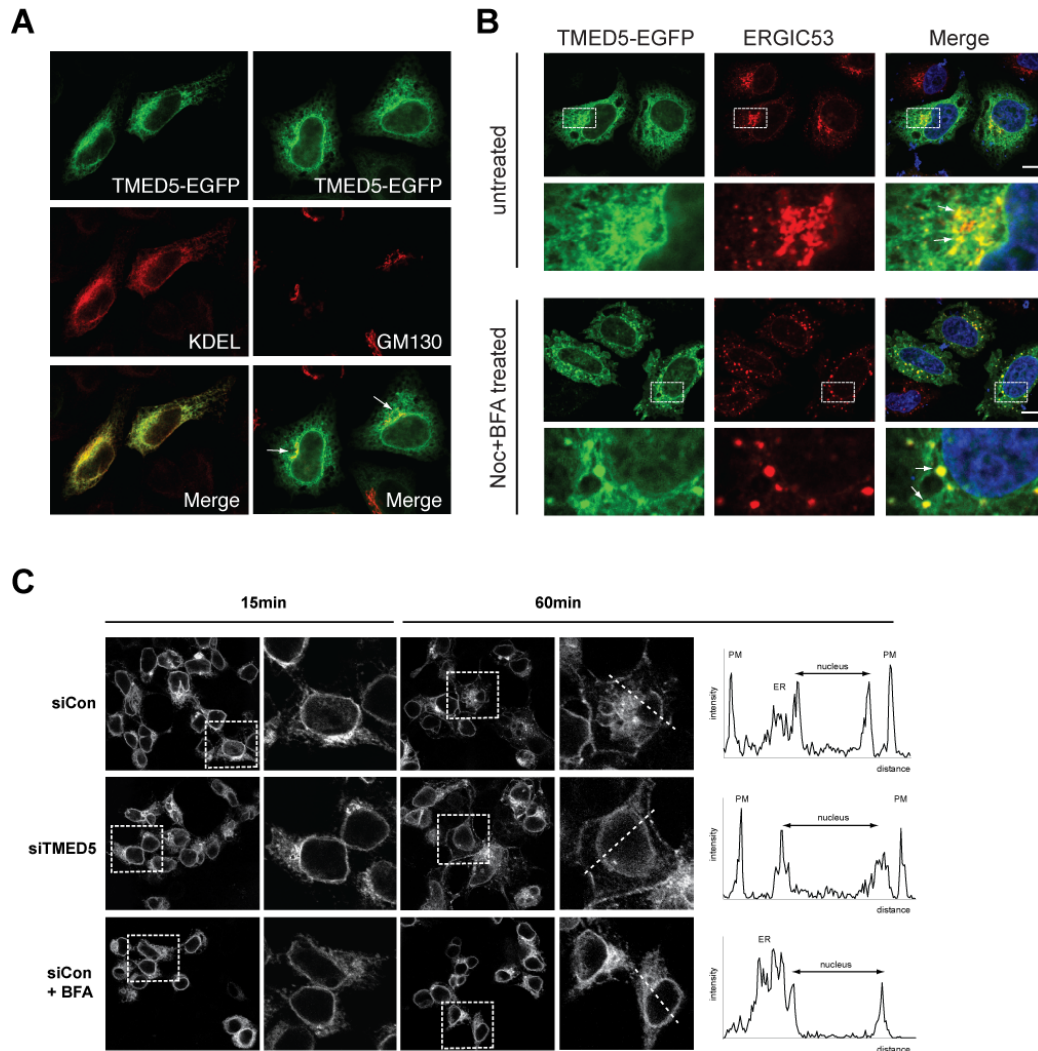

**Figure S2:** TMED5 shuttles within the early secretory pathway. (A) HeLa cells expressing TMED5-EGFP were co-labeled with anti-KDEL and anti-GM130. (B) HeLa cells transfected with CMV-TMED5-EGFP were treated with Nocodazole (Noc) and Brefeldin A (BFA) and immunostained for ERGIC53. Dashed rectangles indicate magnified regions. DNA (Hoechst) is labeled in blue. All transfected cells ( $n > 80$ ) of three independent experiments showed co-localization with ERGIC53. Arrows highlight areas of exemplary colocalization. Scale bars represent  $10 \mu\text{m}$ . (C) Hek293T cells were transfected with the indicated siRNAs and VSVG-GFP and imaged 15 min and 60 min post temperature shift to induce VSVG-GFP secretion from the ER to the plasma membrane. Dashed rectangles indicate magnified regions. VSVG was detected at the plasma membrane in 75% and 70% of cells for siCon and siTMED5, respectively (total number of cells analyzed  $n > 90$ ,  $p < 0.001$ , Chi-square test). No VSVG was detected at the plasma membrane in cells treated with Brefeldin A (BFA) (total number of cells analyzed  $n > 120$ ,  $p < 0.001$ , Chi-square test). (E,J,O) VSVG intensity profiles from cross-sections for 60 min post temperature shift (dashed lines in magnified regions, performed in ImageJ). PM plasma membrane, ER endoplasmatic reticulum.

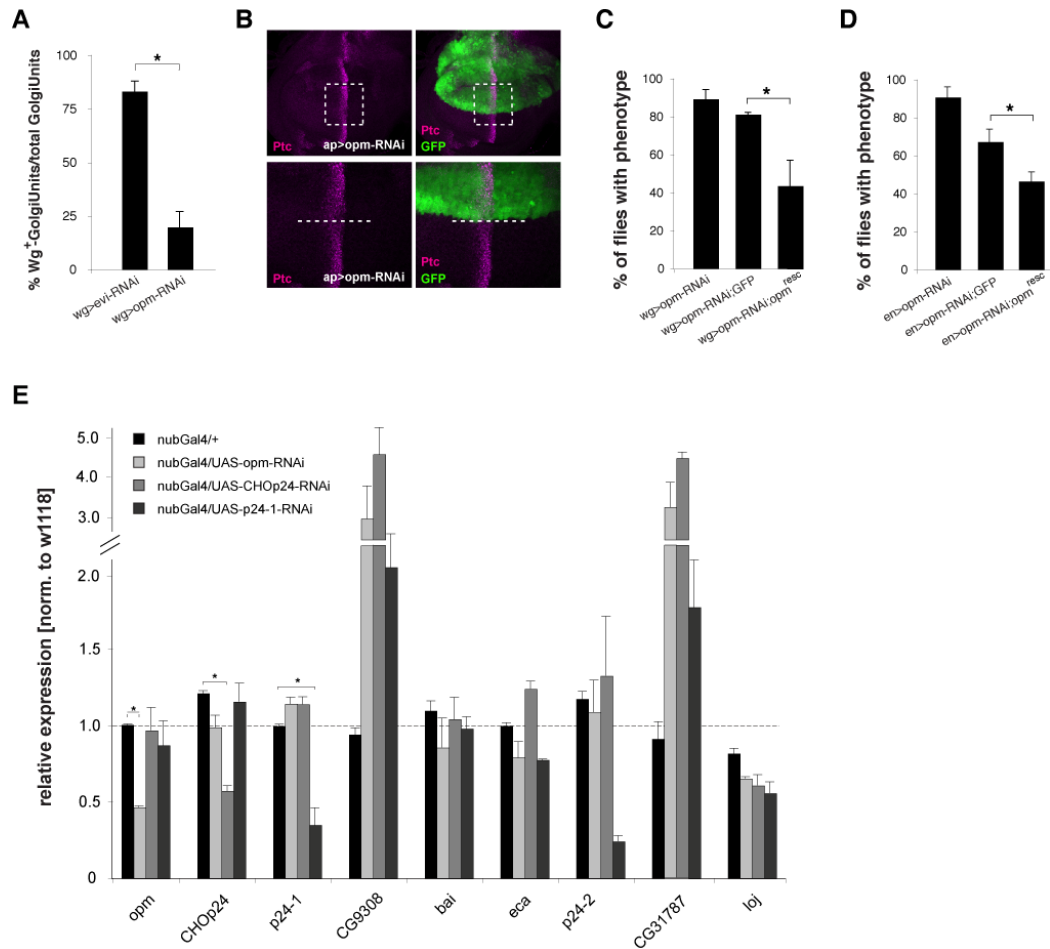

**Figure S3:** p24 proteins are required for Wg secretion in vivo. (A) Quantification of Wg-positive stacked Golgi fragments (units) versus the total number of GM130-positive units within the Wg-secreting cells (\* $p < 0.0001$ ,  $n = 5$ , Chi-square test). (B) Ptc staining of third instar larval wing discs of the genotype apGal4/UAS-opm-RNAi ( $n = 5$  analyzed). GFP marks the RNAi expression domain. The dashed line indicates the D/V boundary. (C) Quantification of flies of the genotypes wgGal4/UAS-opm-RNAi, wgGal4/UAS-opm-RNAi;UAS-GFP/+ and wgGal4/UAS-opm-RNAi;UAS-opm<sup>resc</sup>/+ showing wing margin defects and loss of sensory bristles at 25°C. Data are shown as mean  $\pm$  standard deviation of three independent experiments ( $n > 200$  per genotype, \* $p < 0.0001$ , Chi-square test). (D) Quantification of flies of the genotypes enGal4/UAS-opm-RNAi, enGal4/UAS-opm-RNAi;UAS-GFP/+ and enGal4/UAS-opm-RNAi;UAS-opm<sup>resc</sup>/+ showing wing margin defects and loss of sensory bristles in the posterior compartment of the wing. Data are shown as mean  $\pm$  standard deviation of three independent experiments ( $n > 50$  per genotype, \* $p < 0.0001$ , Chi-square test). (E) Relative expression of p24 proteins in wing discs of the indicated genotypes (nubGal4/UAS-opm-RNAi, nubGal4/UAS-CHOp24-RNAi and nubGal4/+; UAS-p24-1-RNAi/+) normalized to wildtype (w1118). Data are shown as mean  $\pm$  standard deviation ( $p < 0.001$ ,  $n = 3$ , paired Student's t-test).

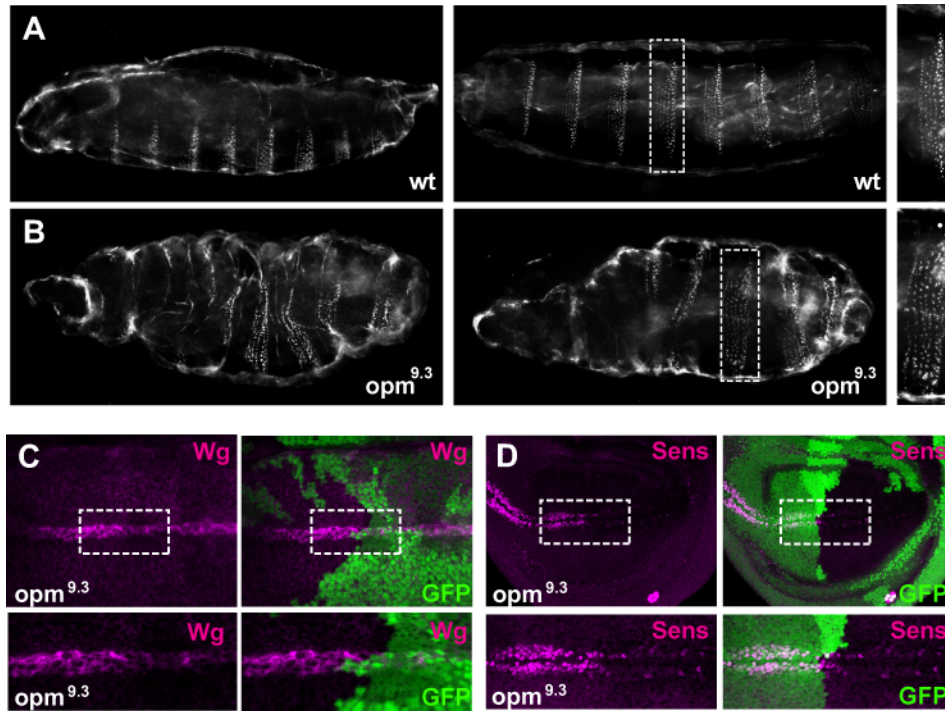

**Figure S4:** *opm* is required for embryonic development. (A-B) Cuticle preparations of wildtype and homozygous *opm*<sup>9.3</sup> mutant embryos lacking maternal contribution in a lateral and ventral view (n>50 analyzed for both genotypes). Dashed rectangles indicate magnified regions of a single segment. (C) Total Wg staining in mitotic *opm*<sup>9.3</sup> mutant clones of third instar wing discs marked by the absence of GFP. (D) Sens staining in *opm*<sup>9.3</sup> mutant clones. Note that Sens is only affected in very large clones (10% penetrance). Clones are marked by the absence of GFP. Dashed rectangles indicate magnified regions.



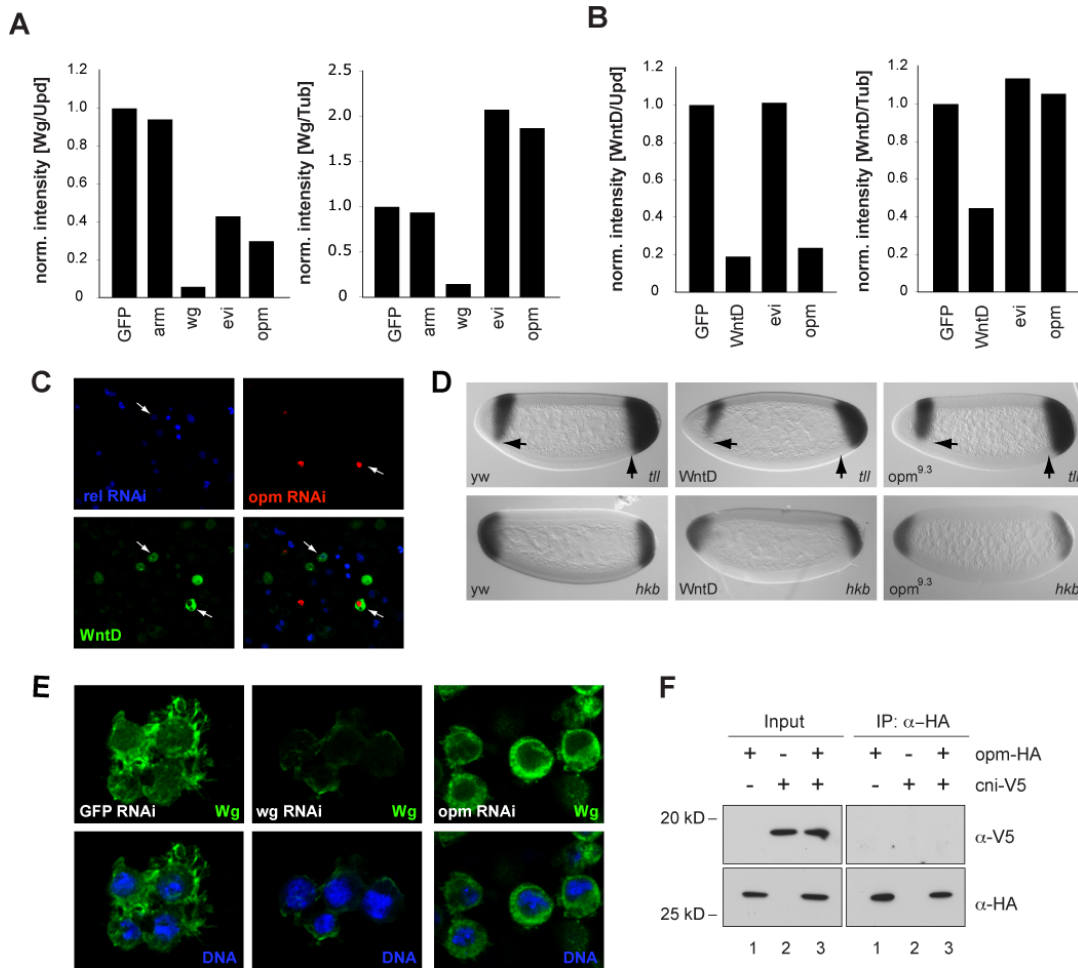

**Figure S5:** Wnt proteins accumulate in *opm*-deficient cells. (A-B) Quantification of Wg and WntD protein amounts in supernatants and lysates, in presence of the indicated dsRNAs. (C) WntD accumulates in *opm*-deficient cells. His-2B-CFP cells depleted for Relish (*rel*) were mixed with His-2B-RFP cells treated with *opm* dsRNAs and transfected with a WntD-HA expression plasmid. Higher levels of WntD-HA can be seen in *opm*-depleted cells suggesting defects in WntD secretion. Arrows mark the different populations of cells. (D) In situ hybridizations on early embryos of the indicated genotypes of the terminal gap genes *tailless* (*tll*) and *huckebein* (*hkb*). Note that *opm<sup>9.3</sup>* embryos phenocopy the WntD mutant phenotype ( $n > 30$  for all genotypes). (E) Wg accumulates in *opm*-deficient cells. S2-*wg*-FLAG cells in the presence of the indicated dsRNAs were immunostained for Wg and Hoechst (blue) to label DNA. (F) Opm control immunoprecipitation experiments: CoIP of Opm-HA and *cni*-V5 from lysates of transfected S2 cells. Cornichon (*cni*) is an ER-resident transmembrane protein.

Supplementary Table 1: RNAi IDs for Transport Proteins based on PANTHER Annotation information and known Wg/Wnt pathway components

| RNAi ID         | Annotation Flybase r5.10 <sup>a</sup> | Annotation Flybase r5.25 <sup>b</sup> | Flybase CG r5.25 | Gene Symbol | Gene Name                        | Screen z score | Viability defect | PANTHER Database Annotation                                         |
|-----------------|---------------------------------------|---------------------------------------|------------------|-------------|----------------------------------|----------------|------------------|---------------------------------------------------------------------|
| BKN22291        | FBgn0085432                           | FBgn0085432                           | CG17964          | pan         | pangolin                         | -9.0           |                  |                                                                     |
| BKN25722        | FBgn0039907                           | FBgn0039907                           | CG2041           | lgs         | legless                          | -9.0           |                  |                                                                     |
| BKN22626        | FBgn0000117                           | FBgn0000117                           | CG11579          | arm         | armadillo                        | -7.2           |                  |                                                                     |
| BKN21133        | FBgn0000119                           | FBgn0000119                           | CG5912           | arr         | arrow                            | -6.8           |                  |                                                                     |
| BKN28114        | FBgn0043900                           | FBgn0043900                           | CG11518          | pygo        | pygopus                          | -6.1           |                  |                                                                     |
| BKN21751        | FBgn0036141                           | FBgn0036141                           | CG6210           | wls/evi     | wntless/evi                      | -5.2           |                  |                                                                     |
| BKN28857        | FBgn0004009                           | FBgn0004009                           | CG4889           | wg          | wingless                         | -5.0           |                  |                                                                     |
| BKN28004        | FBgn0001085                           | FBgn0001085                           | CG17697          | fz          | frizzled                         | -4.6           |                  |                                                                     |
| BKN28967        | FBgn0000499                           | FBgn0000499                           | CG18361          | dsh         | dishevelled                      | -3.3           |                  |                                                                     |
| BKN27517        | FBgn0030606                           | FBgn0030606                           | CG9053           | CG9053      | -                                | -3.1           |                  | T1/ST2 RECEPTOR BINDING PROTEIN (PTHR22811:SF12)                    |
| BKN27384        | FBgn0029709                           | FBgn0029709                           | CG3564           | CHOp24      | CHOp24                           | -3.0           |                  | COPII-COATED VESICLE MEMBRANE PROTEIN P24 (PTHR22811:SF11)          |
| <b>BKN28994</b> | <b>FBgn0003371</b>                    | <b>FBgn0003371</b>                    | <b>CG2621</b>    | <b>sgg</b>  | <b>shaggy</b>                    | <b>-2.8</b>    |                  |                                                                     |
| BKN21319        | FBgn0027338                           | FBgn0027338                           | CG9423           | Kap-alpha3  | karyopherin alpha3               | -2.7           | Yes              | IMPORTIN ALPHA (PTHR23316)                                          |
| BKN20120        | FBgn0037017                           | FBgn0037017                           | CG4074           | CG4074      | -                                | -2.2           |                  | DOWN SYNDROME CRITICAL REGION PROTEIN 3 (PTHR12233:SF2)             |
| BKN27479        | FBgn0044871                           | FBgn0044871                           | CG7700           | Gos28       | Gos28                            | -2.0           |                  | GOS-28 SNARE- RELATED (PTHR21094)                                   |
| BKN28393        | FBgn0033468                           | FBgn0033468                           | CG1418           | CG1418      | -                                | -2.0           |                  | PRENYLATED RAB ACCEPTOR 1-RELATED (PTHR19317)                       |
| BKN20979        | FBgn0026479                           | FBgn0026479                           | CG3210           | Drp1        | Dynamamin related protein 1      | -2.0           |                  | DYNAMIN (PTHR11566:SF12)                                            |
| BKN32384        | FBgn0003888                           | FBgn0003888                           | CG3401           | betaTub60D  | beta-Tubulin at 60D              | -2.0           |                  | TUBULIN BETA CHAIN (PTHR11588:SF9)                                  |
| BKN20463        | FBgn0000319                           | FBgn0000319                           | CG9012           | Chc         | Clathrin heavy chain             | -1.9           |                  | CLATHRIN HEAVY CHAIN (PTHR10292:SF1)                                |
| BKN21152        | FBgn0024689                           | FBgn0024689                           | CG6549           | fws         | four way stop                    | -1.9           |                  | CONSERVED OLIGOMERIC GOLGI COMPLEX COMPONENT 5 (PTHR13228)          |
| BKN20794        | FBgn0001202                           | FBgn0001202                           | CG10653          | hk          | hook                             | -1.9           |                  | HOOK PROTEIN (PTHR18947:SF6)                                        |
| BKN29161        | FBgn0000042                           | FBgn0000042                           | CG4027           | Act5C       | Actin 5C                         | -1.9           |                  | ACTIN (PTHR11937)                                                   |
| <b>BKN28242</b> | <b>FBgn0016797</b>                    | <b>FBgn0016797</b>                    | <b>CG9739</b>    | <b>fz2</b>  | <b>frizzled 2</b>                | <b>-1.8</b>    |                  |                                                                     |
| BKN20960        | FBgn0031262                           | FBgn0260933                           | CG11838          | rempA       | reduced mechanoreceptor potenti  | -1.8           |                  | WD40 IFT-RELATED (PTHR15722:SF4)                                    |
| BKN25639        | FBgn0000346                           | FBgn0000346                           | CG1618           | comt        | comatose                         | -1.8           |                  | VESICULAR-FUSION PROTEIN NSF (PTHR23078)                            |
| BKN29428        | FBgn0038829                           | FBgn0038829                           | CG17271          | CG17271     | -                                | -1.6           |                  | MULTIPLE COAGULATION FACTOR DEFICIENCY PROTEIN 2 (PTHR23104)        |
| BKN20194        | FBgn0015796                           | FBgn0015796                           | CG8287           | Rab8        | Rab-protein 8                    | -1.6           |                  | RAS-RELATED PROTEIN RAB-8 (PTHR11708:SF229)                         |
| BKN27637        | FBgn0028538                           | FBgn0028538                           | CG7578           | sec71       | sec71                            | -1.6           |                  | BREFELDIN A-INHIBITED GE PROTEIN (PTHR10663:SF16)                   |
| BKN22606        | FBgn0043012                           | FBgn0043012                           | CG6056           | AP-2sigma   | AP-2sigma                        | -1.6           |                  | CLATHRIN COAT ASSEMBLY PROTEIN AP17 (PTHR11753:SF6)                 |
| BKN23683        | FBgn0034205                           | FBgn0034205                           | CG10950          | CG10950     | -                                | -1.5           |                  | TRANSPORTIN 3 (PTHR12363:SF5)                                       |
| BKN21011        | FBgn0039303                           | FBgn0039303                           | CG11857          | CG11857     | -                                | -1.5           |                  | RER1 PROTEIN (PTHR10743)                                            |
| BKN21525        | FBgn0021814                           | FBgn0021814                           | CG12770          | Vps28       | Vacuolar protein sorting 28      | -1.5           |                  | VACUOLAR PROTEIN SORTING 28, ISOFORM 2 (VPS28) (PTHR12937)          |
| BKN20103        | FBgn0027496                           | FBgn0027496                           | CG9543           | epsilonCOP  | epsilonCOP                       | -1.5           |                  | COATOMER EPSILON SUBUNIT (PTHR10805)                                |
| BKN27318        | FBgn0038916                           | FBgn0038916                           | CG6560           | dnd         | dead end                         | -1.4           |                  | ADP-RIBOSYLATION FACTOR-LIKE 3, ARL3 (PTHR11711:SF27)               |
| BKN29051        | FBgn0035156                           | FBgn0260862                           | CG3279           | Vti1        | -                                | -1.4           |                  | VESICLE TRANSPORT V-SNARE PROTEIN VTI1A (PTHR21230:SF3)             |
| BKN25891        | FBgn0004374                           | FBgn0004374                           | CG10718          | neb         | nebbish                          | -1.4           |                  | KINESIN-LIKE 38B (PTHR16012:SF179)                                  |
| BKN30523        | FBgn0003888                           | FBgn0003888                           | CG3401           | betaTub60D  | beta-Tubulin at 60D              | -1.3           |                  | TUBULIN BETA CHAIN (PTHR11588:SF9)                                  |
| BKN20500        | FBgn0032796                           | FBgn0032796                           | CG10188          | CG10188     | -                                | -1.3           |                  | RHO GUANINE EXCHANGE FACTOR (PTHR22825)                             |
| BKN29164        | FBgn0030480                           | FBgn0030480                           | CG1660           | Tim9a       | Tim9a                            | -1.3           |                  | MITOCHONDRIAL INNER MEMBRANE TRANSLOCASE (PTHR10898:SF9)            |
| BKN20017        | FBgn0029870                           | FBgn0029870                           | CG3869           | Marf        | Mitochondrial assembly regulator | -1.3           |                  | TRANSMEMBRANE GTPASE MFN (MITOFUSIN 1) (PTHR10465)                  |
| BKN26385        | FBgn0037924                           | FBgn0037924                           | CG14712          | CG14712     | -                                | -1.3           | Yes              | NUCLEAR ENVELOPE PORE MEMBRANE PROTEIN (PTHR23193:SF5)              |
| BKN21714        | FBgn0036702                           | FBgn0036702                           | CG6512           | CG6512      | -                                | -1.3           |                  | MITO. RESPIRATORY CHAIN COMPLEXES ASSEMBLY PROTEIN (PTHR23076:SF11) |
| BKN23268        | FBgn0003545                           | FBgn0003545                           | CG12298          | sub         | subito                           | -1.3           |                  | KINESIN FAMILY MEMBER 20 (RABKINESIN-6) (PTHR16012:SF61)            |
| BKN21728        | FBgn0032341                           | FBgn0032341                           | CG6192           | Reps        | -                                | -1.3           |                  | PARTNER OF RALBP-1 (PTHR11216:SF33)                                 |
| BKN29120        | FBgn0036740                           | FBgn0036740                           | CG6259           | CG6259      | -                                | -1.2           |                  | SNF7 - RELATED (PTHR22761)                                          |

|          |             |             |         |               |                                  |      |     |                                                                    |
|----------|-------------|-------------|---------|---------------|----------------------------------|------|-----|--------------------------------------------------------------------|
| BKN21956 | FBgn0037020 | FBgn0037020 | CG4289  | CG4289        | -                                | -1.2 |     | PEROXISOMAL MEMBRANE PROTEIN PEX14 (PTHR23058)                     |
| BKN28631 | FBgn0033089 | FBgn0033089 | CG17266 | CG17266       | -                                | -1.2 |     | PEPTIDYL-PROLYL CIS-TRANS ISOMERASE H, PPIH (PTHR11071:SF58)       |
| BKN32853 | FBgn0030200 | FBgn0030200 | CG2885  | RabX2         | RabX2                            | -1.2 |     | RAB, DROSOPHILA (PTHR11708:SF204)                                  |
| BKN23084 | FBgn0004868 | FBgn0004868 | CG4422  | Gdi           | GDP dissociation inhibitor       | -1.2 |     | RAB GDP-DISSOCIATION INHIBITOR (PTHR11787)                         |
| BKN20093 | FBgn0032925 | FBgn0032925 | CG9246  | CG9246        | -                                | -1.2 |     | YEAST NUCLEOLAR COMPLEX 2 (PTHR12687:SF4)                          |
| BKN20742 | FBgn0005198 | FBgn0005198 | CG6975  | gig           | gigas                            | -1.2 |     | TUBERIN (PTHR10063)                                                |
| BKN29599 | FBgn0003886 | FBgn0003886 | CG9476  | alphaTub85E   | alpha-Tubulin at 85E             | -1.2 |     | TUBULIN ALPHA CHAIN (PTHR11588:SF10)                               |
| BKN24043 | FBgn0011596 | FBgn0011596 | CG4568  | fzo           | fuzzy onions                     | -1.2 |     | TRANSMEMBRANE GTPASE MFN (MITOFUSIN 1) (FZO HOMOLOG) (PTHR10465)   |
| BKN28716 | FBgn0030877 | FBgn0030877 | CG7846  | Arp8          | Actin-related protein 8          | -1.2 |     | ACTIN-RELATED PROTEIN 6, ARP6 (PTHR11937:SF13)                     |
| BKN27894 | FBgn0033687 | FBgn0033687 | CG8407  | CG8407        | -                                | -1.1 |     | AXONEMAL DYNEIN LIGHT CHAIN 4 (PTHR11886:SF2)                      |
| BKN27799 | FBgn0040228 | FBgn0040228 | CG10846 | dyn-p25       | dynactin-subunit-p25             | -1.1 |     | DYNACTIN SUBUNIT P25 (PTHR13061)                                   |
| BKN22009 | FBgn0035060 | FBgn0035060 | CG16932 | Eps-15        | EGF receptor pathway substrate   | -1.1 |     | EPS-15 (PTHR11216:SF34)                                            |
| BKN21383 | FBgn0031536 | FBgn0031536 | CG3248  | Cog3          | Cog3                             | -1.1 |     | CONSERVED OLIGOMERIC GOLGI COMPLEX COMPONENT 3 (PTHR13302)         |
| BKN23024 | FBgn0013998 | FBgn0013998 | CG33101 | Nsf2          | NEM-sensitive fusion protein 2   | -1.1 |     | VESICULAR-FUSION PROTEIN NSF (PTHR23078)                           |
| BKN20148 | FBgn0015567 | FBgn0015567 | CG4260  | alpha-Adaptin | alpha-Adaptin                    | -1.1 |     | ADAPTER-RELATED PROTEIN COMPLEX 2 ALPHA 1 SUBUNIT (PTHR22780:SF4)  |
| BKN33177 | FBgn0036855 | FBgn0260857 | CG14084 | Bet1          | -                                | -1.0 |     | GOLGI SNARE BET1 (PTHR12791:SF10)                                  |
| BKN21453 | FBgn0035233 | FBgn0035233 | CG7864  | CG7864        | -                                | -1.0 |     | PEROXISOME ASSEMBLY PROTEIN 10 (PTHR23350)                         |
| BKN25566 | FBgn0002948 | FBgn0002948 | CG1763  | nod           | no distributive disjunction      | -1.0 |     | KINESIN-LIKE PROTEIN NOD (PTHR16012:SF185)                         |
| BKN21622 | FBgn0025700 | FBgn0025700 | CG5885  | CG5885        | -                                | -1.0 | Yes | TRANSLOCON-ASSOCIATED PROTEIN (TRAP), GAMMA SUBUNIT (PTHR13399)    |
| BKN29972 | FBgn0051495 | FBgn0051495 | CG31495 | CG31495       | -                                | -1.0 |     | VESICULAR-FUSION PROTEIN NSF (PTHR23078)                           |
| BKN21717 | FBgn0036020 | FBgn0036020 | CG8336  | CG8336        | -                                | -1.0 |     | PEPTIDYL-PROLYL CIS-TRANS ISOMERASE (CYCLOPHILIN) (PTHR11071:SF48) |
| BKN20949 | FBgn0004574 | FBgn0004574 | CG15811 | Rop           | Ras opposite                     | -1.0 |     | SYNTAXIN BINDING PROTEIN-1,2,3 (PTHR11679:SF7)                     |
| BKN27745 | FBgn0028411 | FBgn0028411 | CG12752 | Nxt1          | NTF2-related export protein 1    | -1.0 |     | NUCLEAR TRANSPORT FACTOR 2 (PTHR12612)                             |
| BKN23063 | FBgn0000115 | FBgn0000115 | CG6025  | Arf72A        | Arflike at 72A                   | -1.0 |     | ADP-RIBOSYLATION FACTOR, ARF (PTHR11711:SF30)                      |
| BKN26619 | FBgn0015907 | FBgn0015907 | CG13425 | bl            | bancal                           | -1.0 |     | HETEROGENEOUS NUCLEAR RIBONUCLEOPROTEIN K (PTHR10288:SF38)         |
| BKN20515 | FBgn0053214 | FBgn0053214 | CG33214 | CG33214       | -                                | -1.0 |     | SELECTIN LIGAND RELATED (PTHR11884)                                |
| BKN20630 | FBgn0039925 | FBgn0039925 | CG17461 | Kif3C         | Kif3C                            | -1.0 |     | OSMOTIC ABNORMAL AVOIDANCE 3 (PTHR16012:SF167)                     |
| BKN28333 | FBgn0027594 | FBgn0027594 | CG2086  | drpr          | draper                           | -0.9 |     | EGF-LIKE DOMAIN PROTEIN (PTHR11201:SF146)                          |
| BKN22256 | FBgn0028497 | FBgn0028497 | CG3530  | CG3530        | -                                | -0.9 |     | MYOTUBULARIN-RELATED PROTEIN 6, 7, 8 (PTHR10807:SF11)              |
| BKN29431 | FBgn0004179 | FBgn0004179 | CG6395  | Csp           | Cysteine string protein          | -0.9 |     | DNAJ HOMOLOG SUBFAMILY C MEMBER 5 (PTHR11821:SF22)                 |
| BKN22614 | FBgn0039348 | FBgn0039348 | CG4673  | CG4673        | -                                | -0.9 | Yes | NUCLEAR PROTEIN LOCALIZATION 4 (PTHR12710)                         |
| BKN26540 | FBgn0037307 | FBgn0037307 | CG14666 | Tim17a2       | Tim17a2                          | -0.9 |     | MITOCHONDRIAL INNER MEMBRANE TRANSLOCASE SUBUNIT TIM17 (PTHR10485) |
| BKN21394 | FBgn0026664 | FBgn0260858 | CG1515  | Ykt6          | -                                | -0.9 |     | SNARE PROTEIN YKT6 (PTHR21136:SF5)                                 |
| BKN20155 | FBgn0029834 | FBgn0029834 | CG5937  | CG5937        | -                                | -0.9 |     | PROTEIN TRANSPORT PROTEIN SEC7 (PTHR10663:SF17)                    |
| BKN29340 | FBgn0037084 | FBgn0037084 | CG7736  | Syx6          | Syntaxin 6                       | -0.9 |     | SYNTAXIN 6 (PTHR12380:SF10)                                        |
| BKN28288 | FBgn0030089 | FBgn0030089 | CG9113  | AP-1gamma     | AP-1gamma                        | -0.9 |     | ADAPTER-RELATED PROTEIN COMPLEX 1 GAMMA SUBUNIT (PTHR22780:SF5)    |
| BKN20094 | FBgn0030286 | FBgn0030286 | CG1657  | CG1657        | -                                | -0.9 |     | VACUOLAR PROTEIN SORTING-ASSOCIATED PROTEIN (PTHR23101:SF24)       |
| BKN27046 | FBgn0259210 | FBgn0259210 | CG42310 | prom          | prominin                         | -0.9 |     | PROMININ (PROM) PROTEIN (PTHR22730)                                |
| BKN28988 | FBgn0000257 | FBgn0000257 | CG12230 | car           | carnation                        | -0.8 |     | VACUOLAR PROTEIN SORTING (VPS33) (PTHR11679:SF1)                   |
| BKN25960 | FBgn0032650 | FBgn0032650 | CG7094  | CG7094        | -                                | -0.8 |     | CASEIN KINASE (PTHR11909:SF18)                                     |
| BKN31371 | FBgn0061492 | FBgn0061492 | CG10733 | loj           | logjam                           | -0.8 |     | COP-COATED VESICLE MEMBRANE PROTEIN P24 (PTHR22811:SF9)            |
| BKN21175 | FBgn0026634 | FBgn0026634 | CG6177  | IdlCp         | IdlCp-related protein            | -0.8 |     | CONSERVED OLIGOMERIC GOLGI COMPLEX COMPONENT 2 (PTHR12961)         |
| BKN20755 | FBgn0037357 | FBgn0037357 | CG1250  | sec23         | sec23                            | -0.8 |     | PROTEIN TRANSPORT PROTEIN SEC23 (PTHR11141)                        |
| BKN24140 | FBgn0004377 | FBgn0004377 | CG15844 | Klp54D        | Kinesin-like protein at 54D      | -0.8 |     | KINESIN 12 - RELATED (PTHR16012:SF120)                             |
| BKN27886 | FBgn0041588 | FBgn0041588 | CG31426 | ligatin       | ligatin                          | -0.8 |     | LIGATIN (PTHR12217:SF2)                                            |
| BKN22697 | FBgn0085443 | FBgn0085443 | CG34414 | spri          | sprint                           | -0.8 |     | RAS INTERACTION/INTERFERENCE PROTEIN 1, 2, 3 (PTHR23101:SF3)       |
| BKN21884 | FBgn0029903 | FBgn0029903 | CG4532  | pod1          | pod1                             | -0.8 |     | CORONIN (PTHR10856)                                                |
| BKN22501 | FBgn0032258 | FBgn0032258 | CG7456  | CG7456        | -                                | -0.8 |     | CONSERVED OLIGOMERIC GOLGI COMPLEX COMPONENT 4 (PTHR10483:SF7)     |
| BKN26581 | FBgn0035657 | FBgn0035657 | CG10478 | CG10478       | -                                | -0.8 |     | IMPORTIN ALPHA (PTHR23316)                                         |
| BKN27923 | FBgn0031450 | FBgn0031450 | CG2903  | Hrs           | Hepatocyte growth factor regulat | -0.8 |     | HGF-REGULATED TYROSINE KINASE SUBSTRATE (PTHR13856:SF45)           |
| BKN24070 | FBgn0036085 | FBgn0036085 | CG6527  | CG6527        | -                                | -0.8 |     | VESICLE-ASSOCIATED MEMBRANE PROTEIN (VAMP) (PTHR10809)             |
| BKN20310 | FBgn0004380 | FBgn0004380 | CG10642 | Klp64D        | Kinesin-like protein at 64D      | -0.8 |     | KINESIN-LIKE PROTEIN KIF3 (PTHR16012:SF161)                        |

|          |             |                         |         |             |                                     |      |                                                                      |
|----------|-------------|-------------------------|---------|-------------|-------------------------------------|------|----------------------------------------------------------------------|
| BKN21620 | FBgn0033460 | FBgn0033460             | CG1472  | sec24       | sec24                               | -0.8 | SEC24-RELATED PROTEIN (PTHR13803)                                    |
| BKN27687 | FBgn0028400 | FBgn0028400             | CG10047 | Syt4        | Synaptotagmin 4                     | -0.8 | SYNAPTOTAGMIN-4, INSECTS (PTHR10024:SF32)                            |
| BKN21840 | FBgn0036207 | FBgn0036207             | CG10907 | CG10907     | -                                   | -0.8 | PEPTIDYL-PROLYL CIS-TRANS ISOMERASE (CYCLOPHILIN) (PTHR11071:SF33)   |
| BKN20096 | FBgn0034708 | FBgn0034708             | CG5625  | Vps35       | Vacuolar protein sorting 35         | -0.7 | VACUOLAR SORTING PROTEIN 35 (PTHR11099)                              |
| BKN32400 | FBgn0030377 | FBgn0030377             | CG1924  | CG1924      | -                                   | -0.7 | CALNEXIN (PTHR11073:SF1)                                             |
| BKN20511 | FBgn0033714 | FBgn0033714             | CG8487  | garz        | gartenzwerg                         | -0.7 | GOLGI-SPECIFIC BREFELDIN A-RESISTANCE FACTOR (PTHR10663:SF8)         |
| BKN20803 | FBgn0011692 | FBgn0011692             | CG1258  | pav         | pavarotti                           | -0.7 | RABKINESIN-6 - RELATED (PTHR16012:SF188)                             |
| BKN20815 | FBgn0023172 | FBgn0023172             | CG9635  | RhoGEF2     | RhoGEF2                             | -0.7 | RHO GUANINE EXCHANGE FACTOR (PTHR22825)                              |
| BKN22724 | FBgn0031408 | FBgn0031408             | CG10882 | CG10882     | -                                   | -0.7 | SEC24-RELATED PROTEIN (PTHR13803)                                    |
| BKN24479 | FBgn0035155 | FBgn0035155             | CG12015 | RabX6       | RabX6                               | -0.7 | RAS-RELATED PROTEIN RAB (PTHR11708:SF144)                            |
| BKN20516 | FBgn0038576 | FBgn0038576             | CG7940  | Arp5        | Actin-related protein 5             | -0.7 | ACTIN-RELATED PROTEIN 5, ARP5 (PTHR11937:SF16)                       |
| BKN22786 | FBgn0013756 | FBgn0013756             | CG8274  | Mtor        | Megator                             | -0.7 | NUCLEOPROTEIN TPR-RELATED (PTHR18898)                                |
| BKN27500 | FBgn0004176 | FBgn0260639             | CG3157  | gammaTub23C | gamma-Tubulin at 23C                | -0.7 | TUBULIN GAMMA CHAIN (PTHR11588:SF7)                                  |
| BKN20866 | FBgn0013563 | FBgn0013563             | CG6760  | l(3)70Da    | lethal (3) 70Da                     | -0.7 | PEROXISOME BIOGENESIS FACTOR 1 (PEROXIN-1) (PTHR23077:SF12)          |
| BKN23792 | FBgn0034566 | FBgn0034566             | CG9313  | CG9313      | -                                   | -0.7 | AXONEMAL DYNEIN INTERMEDIATE CHAIN POLYPEPTIDE 1 (PTHR12442:SF11)    |
| BKN22740 | FBgn0022213 | FBgn0022213             | CG13281 | Cas         | CAS/CSE1 segregation protein        | -0.7 | IMPORTIN-ALPHA RE-EXPORTER ) (PTHR10997:SF8)                         |
| BKN24982 | FBgn0035100 | FBgn0035100             | CG7051  | CG7051      | -                                   | -0.7 | gb def. LP11180p (Fragment) (PTHR12442:SF8)                          |
| BKN28559 | FBgn0036204 | FBgn0036204             | CG11611 | Tim13       | Tim13                               | -0.7 | TRANSLOCASE OF INNER MITOCHONDRIAL MEMBRANE 13 (PTHR19338)           |
| BKN28271 | FBgn0028552 | FBgn0028552             | CG3988  | gammaSnap   | gamma-soluble NSF attachment        | -0.7 | GAMMA-SOLUBLE NSF ATTACHMENT PROTEIN (SNAP-GAMMA) (PTHR13768:SF2)    |
| BKN31312 | FBgn0002936 | FBgn0002936             | CG3966  | ninaA       | neither inactivation nor afterpoter | -0.6 | CYCLOPHILIN-R (PTHR11071:SF50)                                       |
| BKN21390 | FBgn0027363 | FBgn0027363             | CG6521  | Stam        | Signal transducing adaptor molec    | -0.6 | Yes SIGNAL TRANSDUCING ADAPTER MOLECULE (STAM) (PTHR13856:SF23)      |
| BKN32081 | FBgn0000045 | FBgn0000045             | CG7478  | Act79B      | Actin 79B                           | -0.6 | ACTIN (PTHR11937)                                                    |
| BKN20222 | FBgn0030476 | FBgn0261085             | CG10617 | Syt12       | Synaptotagmin 12                    | -0.6 | SYNAPTOTAGMIN-12 (PTHR10024:SF15)                                    |
| BKN28809 | FBgn0031310 | FBgn0031310             | CG4764  | CG4764      | -                                   | -0.6 | VACUOLAR SORTING PROTEIN VPS29 (PTHR11124)                           |
| BKN22400 | FBgn0035866 | FBgn0035866             | CG7197  | CG7197      | -                                   | -0.6 | ADP-RIBOSYLATION FACTOR-LIKE 5, ARL5 (PTHR11711:SF31)                |
| BKN26746 | FBgn0004381 | FBgn0004381             | CG7293  | Klp68D      | Kinesin-like protein at 68D         | -0.6 | KINESIN-LIKE PROTEIN KLP68D (PTHR16012:SF168)                        |
| BKN27584 | FBgn0086913 | FBgn0086913             | CG34410 | Rab26       | Rab26                               | -0.6 | RAS-RELATED PROTEIN RAB-37 AND 26 (PTHR11708:SF209)                  |
| BKN27793 | FBgn0031050 | FBgn0031050             | CG12235 | Arp11       | Arp11                               | -0.6 | ACTIN-RELATED PROTEIN 10, ARP10 (PTHR11937:SF14)                     |
| BKN24636 | FBgn0028974 | FBgn0028974             | CG32562 | xmas-2      | xmas-2                              | -0.6 | 80 KDA MCM3-ASSOCIATED PROTEIN (PTHR12436:SF3)                       |
| BKN21004 | FBgn0038908 | FBgn0260940             | CG6637  | lsn         | larsen                              | -0.6 | EAP30 SUBUNIT OF ELL COMPLEX (PTHR12806)                             |
| BKN30094 | FBgn0031164 | FBgn0031164             | CG1724  | CG1724      | -                                   | -0.6 | MITOCHONDRIAL INNER MEMBRANE TRANSLOCASE SUBUNIT TIM17 (PTHR10485)   |
| BKN22699 | FBgn0035799 | FBgn0035799             | CG14838 | CG14838     | -                                   | -0.6 | TESTIS DEVELOPMENT PROTEIN NYD-SP29 (PTHR12442:SF5)                  |
| BKN22445 | FBgn0001308 | FBgn0001308             | CG7765  | Khc         | Kinesin heavy chain                 | -0.6 | KINESIN HEAVY CHAIN SUBUNIT 5 (PTHR16012:SF131)                      |
| BKN28654 | FBgn0038947 | FBgn0038947             | CG7073  | sar1        | sar1                                | -0.6 | GTP-BINDING PROTEIN SAR1 (PTHR11711:SF12)                            |
| BKN20234 | FBgn0052758 | FBgn0052758             | CG32758 | CG32758     | -                                   | -0.5 | SORTING NEXIN 27 (PTHR12431:SF1)                                     |
| BKN28941 | FBgn0004575 | FBgn0004575             | CG3985  | Syn         | Synapsin                            | -0.5 | SYNAPSIN RELATED (PTHR10841:SF3)                                     |
| BKN25506 | FBgn0040232 | FBgn0040232             | CG6392  | cmet        | CENP-meta                           | -0.5 | KINESIN-LIKE KINETOCHORE MOTOR PROTEIN CENP (PTHR16012:SF190)        |
| BKN20275 | FBgn0051048 | FBgn0051048             | CG31048 | CG31048     | -                                   | -0.5 | DOCK-3,4 (PTHR23317:SF28)                                            |
| BKN27776 | FBgn0031282 | FBgn0031282             | CG3639  | CG3639      | -                                   | -0.5 | PEROXISOME ASSEMBLY PROTEIN 12 (PEROXIN-12) (PTHR12888)              |
| BKN29413 | FBgn0027360 | FBgn0260223&FBgn0027360 | CG9878  | Tim10       | Translocase of inner membrane       | -0.5 | MITOCHONDRIAL INNER MEMBRANE TRANSLOCASE SUBUNIT TIM10 (PTHR11038:SF |
| BKN24453 | FBgn0051787 | FBgn0051787             | CG31787 | CG31787     | -                                   | -0.5 | T1/ST2 RECEPTOR BINDING PROTEIN (PTHR22811:SF12)                     |
| BKN23487 | FBgn0011823 | FBgn0011823             | CG4799  | Pen         | Pendulin                            | -0.5 | IMPORTIN ALPHA (PTHR23316)                                           |
| BKN21724 | FBgn0024753 | FBgn0024753             | CG32593 | Flo-2       | flotillin 2                         | -0.5 | FLOTILLIN-2 (PTHR13806:SF9)                                          |
| BKN28099 | FBgn0027356 | FBgn0027356             | CG8604  | Amph        | Amphiphysin                         | -0.5 | BRIDGING INTEGRATOR (PTHR10321:SF9)                                  |
| BKN21865 | FBgn0036756 | FBgn0036756             | CG5582  | cln3        | cln3                                | -0.5 | CLN3/BATTENIN (PTHR10981)                                            |
| BKN27626 | FBgn0036928 | FBgn0036928             | CG7654  | Tom20       | Translocase of outer membrane       | -0.5 | MITOCHONDRIAL IMPORT RECEPTOR SUBUNIT TOM20 (PTHR12430)              |
| BKN26117 | FBgn0030384 | FBgn0030384             | CG2577  | CG2577      | -                                   | -0.5 | CASEIN KINASE (PTHR11909:SF18)                                       |
| BKN23171 | FBgn0039302 | FBgn0039302             | CG11856 | Nup358      | Nup358                              | -0.5 | RAN-BINDING PROTEIN (PTHR23138:SF5)                                  |
| BKN28949 | FBgn0053113 | FBgn0053113             | CG33113 | Rtnl1       | Rtnl1                               | -0.5 | RETICULON-RELATED (PTHR10994:SF22)                                   |
| BKN32674 | FBgn0259679 | FBgn0261556             | CG42674 | CG42674     | -                                   | -0.5 | RHO GUANINE EXCHANGE FACTOR (PTHR22825)                              |
| BKN20855 | FBgn0027565 | FBgn0027565             | CG5498  | CG5498      | -                                   | -0.5 | SNF7 - RELATED (PTHR22761)                                           |
| BKN22816 | FBgn0027617 | FBgn0027617             | CG5808  | CG5808      | -                                   | -0.5 | PEPTIDYL-PROLYL CIS-TRANS ISOMERASE-LIKE 4. PPIL4 (PTHR11071:SF27)   |

|          |             |                         |         |             |                                 |      |     |                                                                     |
|----------|-------------|-------------------------|---------|-------------|---------------------------------|------|-----|---------------------------------------------------------------------|
| BKN29198 | FBgn0034314 | FBgn0034314             | CG5140  | nopo        | no poles                        | -0.4 |     | ZN/RING FINGER PROTEIN 2 (PTHR22937:SF6)                            |
| BKN29059 | FBgn0035992 | FBgn00260859            | CG3911  | Bet3        | -                               | -0.4 |     | TRAFFICKING PROTEIN PARTICLE COMPLEX SUBUNIT 3 (PTHR13048)          |
| BKN33357 | FBgn0003890 | FBgn0003890             | CG4869  | betaTub97EF | beta-Tubulin at 97EF            | -0.4 |     | TUBULIN BETA CHAIN (PTHR11588:SF9)                                  |
| BKN22625 | FBgn0034367 | FBgn0034367             | CG5341  | sec6        | sec6                            | -0.4 |     | EXOCYST COMPLEX COMPONENT SEC6 (PTHR21292:SF5)                      |
| BKN21129 | FBgn0010246 | FBgn0010246             | CG9155  | Myo61F      | Myosin 61F                      | -0.4 |     | MYOSIN I (PTHR13140:SF31)                                           |
| BKN30862 | FBgn0000044 | FBgn0000044             | CG10067 | Act57B      | Actin 57B                       | -0.4 |     | ACTIN (PTHR11937)                                                   |
| BKN23482 | FBgn0034681 | FBgn0034681             | CG9308  | CG9308      | -                               | -0.4 |     | COPII-COATED VESICLE MEMBRANE PROTEIN P24 (PTHR22811:SF11)          |
| BKN31854 | FBgn0000043 | FBgn0000043             | CG12051 | Act42A      | Actin 42A                       | -0.4 |     | ACTIN (PTHR11937)                                                   |
| BKN28759 | FBgn0029687 | FBgn0029687             | CG5014  | Vap-33-1    | Vap-33-1                        | -0.4 |     | VESICLE-ASSOCIATED MEMBRANE PROTEIN (VAMP) (PTHR10809)              |
| BKN27586 | FBgn0031537 | FBgn0031537             | CG8843  | sec5        | sec5                            | -0.4 |     | EXOCYST COMPLEX COMPONENT SEC5 (PTHR13043)                          |
| BKN21494 | FBgn0030582 | FBgn0030582             | CG14411 | CG14411     | -                               | -0.4 |     | MYOTUBULARIN-RELATED PROTEIN 10, 11, 12 (PTHR10807:SF3)             |
| BKN26270 | FBgn0000352 | FBgn0000352             | CG1708  | cos         | costa                           | -0.4 |     | KINESIN-RELATED PROTEIN (PTHR16012:SF34)                            |
| BKN28359 | FBgn0030341 | FBgn0030341             | CG1967  | p24-1       | p24-related-1                   | -0.4 |     | COP-COATED VESICLE MEMBRANE PROTEIN EMP24 (PTHR22811:SF13)          |
| BKN20484 | FBgn0039120 | FBgn0039120             | CG10198 | Nup98       | Nup98                           | -0.4 |     | NUCLEOPORIN (PTHR23198)                                             |
| BKN28368 | FBgn0051229 | FBgn0051229             | CG31229 | CG31229     | -                               | -0.4 |     | MITOCHONDRIAL INNER MEMBRANE TRANSLOCASE SUBUNIT TIM22 (PTHR14110)  |
| BKN33062 | FBgn0000047 | FBgn0000047             | CG5178  | Act88F      | Actin 88F                       | -0.4 |     | ACTIN (PTHR11937)                                                   |
| BKN28297 | FBgn0015790 | FBgn0015790             | CG5771  | Rab11       | Rab-protein 11                  | -0.4 |     | RAS-RELATED PROTEIN RAB-11 (PTHR11708:SF213)                        |
| BKN28660 | FBgn0031090 | FBgn0031090             | CG9575  | Rab35       | Rab35                           | -0.4 |     | RAS-RELATED PROTEIN RAB-35 (RAB-1C) (PTHR11708:SF228)               |
| BKN20464 | FBgn0037711 | FBgn0261049             | CG8228  | Vps45       | Vacuolar protein sorting 45     | -0.4 |     | VACUOLAR PROTEIN SORTING-ASSOCIATED (PTHR11679:SF3)                 |
| BKN27630 | FBgn0014009 | FBgn0014009             | CG3269  | Rab2        | Rab-protein 2                   | -0.4 |     | RAS-RELATED PROTEIN RAB-2 (PTHR11708:SF246)                         |
| BKN22652 | FBgn0259679 | FBgn0261556             | CG42674 | CG42674     | -                               | -0.4 |     | RHO GUANINE EXCHANGE FACTOR (PTHR22825)                             |
| BKN28775 | FBgn0033527 | FBgn0033527             | CG11777 | CG11777     | -                               | -0.3 |     | CYCLOPHILIN-10 (PTHR11071:SF38)                                     |
| BKN20036 | FBgn0037233 | FBgn0261086             | CG9778  | Syt14       | Synaptotagmin 14                | -0.3 |     | SYNAPTOTAGMIN-14 (PTHR10024:SF14)                                   |
| BKN26044 | FBgn0040096 | FBgn0040096             | CG16834 | lectin-33A  | lectin-33A                      | -0.3 |     | MACROPHAGE MANNOSE RECEPTOR (PTHR22803:SF17)                        |
| BKN22889 | FBgn0021761 | FBgn0021761             | CG4579  | Nup154      | Nup154                          | -0.3 | Yes | NUCLEAR PORE COMPLEX PROTEIN NUP154 (PTHR10350:SF5)                 |
| BKN33708 | FBgn0016976 | FBgn0016975&FBgn0016976 | CG12500 | stnA        | stoned A                        | -0.3 |     | STONED-RELATED (PTHR11998:SF1)                                      |
| BKN22849 | FBgn0016700 | FBgn0016700             | CG3320  | Rab1        | Rab-protein 1                   | -0.3 |     | RAS-RELATED PROTEIN RAB-1 (PTHR11708:SF227)                         |
| BKN21759 | FBgn0038856 | FBgn0038856             | CG7034  | sec15       | sec15                           | -0.3 |     | SEC15 (PTHR12702)                                                   |
| BKN28849 | FBgn0015795 | FBgn0015795             | CG5915  | Rab7        | Rab-protein 7                   | -0.3 | Yes | RAS-RELATED PROTEIN RAB-7 (PTHR11708:SF260)                         |
| BKN22564 | FBgn0086357 | FBgn0086357             | CG9539  | Sec61alpha  | Sec61alpha                      | -0.3 |     | PREPROTEIN TRANSLOCASE SECY SUBUNIT (SEC61) (PTHR10906:SF1)         |
| BKN33740 | FBgn0016976 | FBgn0016975&FBgn0016976 | CG12500 | stnA        | stoned A                        | -0.3 |     | STONED-RELATED (PTHR11998:SF1)                                      |
| BKN27901 | FBgn0004575 | FBgn0004575             | CG3985  | Syn         | Synapsin                        | -0.3 |     | SYNAPSIN RELATED (PTHR10841:SF3)                                    |
| BKN27706 | FBgn0024923 | FBgn0261014             | CG2331  | TER94       | TER94                           | -0.3 |     | TRANSITIONAL ENDOPLASMIC RETICULUM ATPASE (PTHR23077:SF18)          |
| BKN23263 | FBgn0035574 | FBgn0035574             | CG32239 | Gef64C      | Guanine nucleotide exchange fac | -0.3 |     | RHO GUANINE EXCHANGE FACTOR (PTHR22825)                             |
| BKN28784 | FBgn0016701 | FBgn0016701             | CG4921  | Rab4        | Rab-protein 4                   | -0.3 |     | RAS-RELATED PROTEIN RAB-4 (PTHR11708:SF247)                         |
| BKN28680 | FBgn0250823 | FBgn0250823             | CG6963  | gish        | gilgamesh                       | -0.3 |     | CASEIN KINASE (PTHR11909:SF18)                                      |
| BKN29346 | FBgn0025726 | FBgn0025726             | CG2999  | unc-13      | unc-13                          | -0.3 |     | UNC-13 (MUNC13) (PTHR10480)                                         |
| BKN21029 | FBgn0028421 | FBgn0028421             | CG11759 | Kap3        | Kinesin associated protein 3    | -0.3 |     | KINESIN-ASSOCIATED PROTEIN (PTHR15605:SF3)                          |
| BKN32286 | FBgn0033357 | FBgn0033357             | CG8226  | Tom7        | Translocase of outer membrane   | -0.3 |     | TRANSLOCASE OF OUTER MEMBRANE SUBUNIT TOM7 (PTHR16463)              |
| BKN27476 | FBgn0021825 | FBgn0021825             | CG8269  | Dmn         | Dynamitin                       | -0.3 |     | DYNACTIN SUBUNIT (PTHR15346)                                        |
| BKN31291 | FBgn0020371 | FBgn0020371             | CG15257 | Tim17b2     | Translocase inner membrane 17   | -0.3 |     | MITOCHONDRIAL INNER MEMBRANE TRANSLOCASE SUBUNIT TIM17 (PTHR10485)  |
| BKN20233 | FBgn0035909 | FBgn0035909             | CG6822  | ergic53     | ergic53                         | -0.3 |     | ERGIC-53 PROTEIN (MANNOSE-BINDING LECTIN 1)-RELATED (PTHR12223:SF7) |
| BKN23040 | FBgn0022027 | FBgn0022027             | CG14750 | Vps25       | Vacuolar protein sorting 25     | -0.2 |     | VACUOLAR PROTEIN SORTING-ASSOCIATED PROTEIN VPS25 (PTHR13149)       |
| BKN29210 | FBgn0015789 | FBgn0015789             | CG17060 | Rab10       | Rab-protein 10                  | -0.2 |     | RAS-RELATED PROTEIN RAB-10 (PTHR11708:SF230)                        |
| BKN22052 | FBgn0019925 | FBgn0019925             | CG6202  | Surf4       | Surfeit 4                       | -0.2 |     | SURFEIT LOCUS PROTEIN 4 (PTHR23427:SF1)                             |
| BKN25711 | FBgn0033074 | FBgn0033074             | CG8330  | tomboy40    | tomboy40                        | -0.2 |     | MITOCHONDRIAL IMPORT RECEPTOR SUBUNIT TOM40 (PTHR10802)             |
| BKN22171 | FBgn0033737 | FBgn0033737             | CG8831  | CG8831      | -                               | -0.2 |     | NUCLEOPORIN P54 (PTHR13000)                                         |
| BKN28741 | FBgn0039110 | FBgn0039110             | CG10225 | CG10225     | -                               | -0.2 |     | RAN-BINDING PROTEIN 3 (PTHR23138:SF4)                               |
| BKN21423 | FBgn0029789 | FBgn0029789             | CG3160  | CG3160      | -                               | -0.2 |     | GPI INOSITOL DEACYLASE PGAP1 (PTHR15495:SF3)                        |
| BKN33032 | FBgn0026878 | FBgn0026878             | CG4325  | CG4325      | -                               | -0.2 |     | ZN/RING FINGER PROTEIN 2 (PTHR22937:SF6)                            |
| BKN24551 | FBgn0038387 | FBgn0038387             | CG5268  | blp         | black pearl                     | -0.2 | Yes | MITOCHONDRIA ASSOCIATED GRANULOCYTE MACROPHAGE MOLECULE (PTHR123)   |
| BKN20533 | FBgn0027103 | FBgn0027103             | CG6159  | sec10       | sec10                           | -0.2 |     | SEC10 (PTHR12100)                                                   |

|                 |                    |                    |               |            |                                 |            |     |                                                                         |
|-----------------|--------------------|--------------------|---------------|------------|---------------------------------|------------|-----|-------------------------------------------------------------------------|
| BKN26032        | FBgn0011743        | FBgn0011743        | CG5409        | Arp53D     | Actin-related protein 53D       | -0.2       |     | ACTIN-RELATED PROTEIN (PTHR11937:SF46)                                  |
| BKN21890        | FBgn0035255        | FBgn0035255        | CG7980        | RabX5      | RabX5                           | -0.2       |     | RAS-RELATED PROTEIN RAB-34 AND 36 (PTHR11708:SF267)                     |
| BKN29041        | FBgn0032782        | FBgn0032782        | CG9994        | Rab9       | Rab9                            | -0.2       |     | RAS-RELATED PROTEIN RAB-9 (PTHR11708:SF261)                             |
| BKN26350        | FBgn0032653        | FBgn0261089        | CG5559        | Sytalpa    | Synaptotagmin alpha             | -0.2       |     | SYNAPTOTAGMIN-RELATED (PTHR10024:SF35)                                  |
| BKN20849        | FBgn0031990        | FBgn0031990        | CG8552        | CG8552     | -                               | -0.2       |     | SEC-23 INTERACTING PROTEIN P125 (PTHR15457:SF6)                         |
| BKN20714        | FBgn0040475        | FBgn0040475        | CG6757        | SH3PX1     | SH3PX1                          | -0.2       |     | SORTING NEXIN-RELATED (PTHR10555:SF12)                                  |
| BKN27338        | FBgn0026252        | FBgn0026252        | CG7935        | msk        | moleskin                        | -0.2       |     | IMPORTIN 7, 8 (IMP7, 8) (RAN-BINDING PROTEIN 7, 8) (PTHR10997:SF18)     |
| BKN20881        | FBgn0004379        | FBgn0004379        | CG10923       | Klp67A     | Kinesin-like protein at 67A     | -0.2       |     | KINESIN-LIKE PROTEIN 5, 6 (PTHR16012:SF110)                             |
| BKN21782        | FBgn0001087        | FBgn0001087        | CG10986       | g          | garnet                          | -0.2       |     | APL5 PROTEIN (PTHR22781:SF9)                                            |
| BKN20873        | FBgn0002121        | FBgn0002121        | CG2671        | l(2)gl     | lethal (2) giant larvae         | -0.2       |     | LETHAL GIANT LARVAE (PTHR10241:SF10)                                    |
| BKN20672        | FBgn0039889        | FBgn0039889        | CG2219        | CG2219     | -                               | -0.2       |     | ADP-RIBOSYLATION FACTOR-LIKE 4, ARL4 (PTHR11711:SF28)                   |
| BKN20643        | FBgn0023458        | FBgn0023458        | CG3585        | Rbcn-3A    | Rabconnectin-3A                 | -0.2       |     | RABCONNECTIN (PTHR13950:SF1)                                            |
| BKN20665        | FBgn0037674        | FBgn0261241        | CG8454        | Vps16A     | Vacuolar protein sorting 16A    | -0.2       |     | VACUOLAR PROTEIN SORTING VPS16 (PTHR12811)                              |
| BKN24300        | FBgn0039252        | FBgn0039252        | CG11771       | CG11771    | -                               | -0.1       |     | OLIGOPEPTIDASE (PTHR11804:SF6)                                          |
| BKN20337        | FBgn0030141        | FBgn0030141        | CG3002        | Gga        | Gga                             | -0.1       |     | GAMMA ADAPTIN EAR CONTAINING, ARF BINDING PROTEIN RELATED (PTHR13856:S) |
| BKN29075        | FBgn0038323        | FBgn0038323        | CG6196        | CG6196     | -                               | -0.1       |     | TRAFFICKING PROTEIN PARTICLE COMPLEX SUBUNIT 6B (PTHR12817)             |
| BKN28181        | FBgn0040285        | FBgn0040285        | CG9195        | Scamp      | Scamp                           | -0.1       |     | SECRETORY CARRIER-ASSOCIATED MEMBRANE PROTEIN (PTHR10687:SF4)           |
| BKN28524        | FBgn0051721        | FBgn0051721        | CG31721       | Trim9      | Trim9                           | -0.1       |     | TRIPARTITE MOTIF PROTEIN TRIM9 (PTHR13712:SF62)                         |
| BKN21980        | FBgn0028736        | FBgn0261274        | CG1333        | Ero1L      | Endoplasmic reticulum oxidoredu | -0.1       |     | ERO1-RELATED (PTHR12613)                                                |
| BKN22600        | FBgn0034095        | FBgn0034095        | CG15701       | CG15701    | -                               | -0.1       |     | DYNEIN INTERMEDIATE CHAIN (PTHR12442)                                   |
| BKN31781        | FBgn0000046        | FBgn0000046        | CG18290       | Act87E     | Actin 87E                       | -0.1       |     | ACTIN (PTHR11937)                                                       |
| BKN21703        | FBgn0030820        | FBgn0260748        | CG5004        | CG5004     | -                               | -0.1       |     | PLECKSTRIN HOMOLOGY-LIKE DOMAIN (PTHR16012:SF203)                       |
| BKN22143        | FBgn0027539        | FBgn0027539        | CG5807        | CG5807     | -                               | -0.1       |     | LIPOCALIN-1 INTERACTING MEMBRANE RECEPTOR (LIMR) (PTHR12625)            |
| BKN23077        | FBgn0032347        | FBgn0260937        | CG4738        | Nup160     | nuclear pore protein 160        | -0.1       |     | NUCLEAR PORE COMPLEX PROTEIN NUP160 (PTHR21286)                         |
| BKN22957        | FBgn0031829        | FBgn0031829        | CG9595        | osm-6      | osm-6                           | -0.1       |     | OSM-6-RELATED (PTHR12969:SF1)                                           |
| BKN28572        | FBgn0011016        | FBgn0011016        | CG5474        | SsRbeta    | Signal sequence receptor beta   | -0.1       |     | TRANSLOCON-ASSOCIATED PROTEIN, BETA SUBUNIT PRECURSOR (PTHR12861)       |
| BKN29376        | FBgn0069242        | FBgn0069242        | CG33104       | eca        | eclair                          | -0.1       |     | GLYCOPROTEIN 25L (PTHR22811:SF3)                                        |
| BKN27583        | FBgn0039160        | FBgn0039160        | CG5510        | CG5510     | -                               | -0.1       |     | VESICULAR INTEGRAL-MEMBRANE PROTEIN VIP36 (PTHR12223:SF6)               |
| BKN22085        | FBgn0004003        | FBgn0004003        | CG7225        | wbl        | windbeutel                      | -0.1       |     | ENDOPLASMIC RETICULUM PROTEIN ERP29 (PTHR12211)                         |
| BKN29397        | FBgn0030391        | FBgn0030391        | CG1900        | Rab40      | Rab40                           | -0.1       |     | RAS-RELATED PROTEIN RAB-40 (PTHR11708:SF146)                            |
| BKN23859        | FBgn0030620        | FBgn0030620        | CG5662        | CG5662     | -                               | -0.1       |     | METAXIN 2 (PTHR12289:SF11)                                              |
| BKN27357        | FBgn0024814        | FBgn0024814        | CG6948        | Clc        | Clathrin light chain            | -0.1       |     | CLATHRIN LIGHT CHAIN (PTHR10639)                                        |
| BKN20430        | FBgn0087013        | FBgn0087013        | CG1059        | Karybeta3  | Karyopherin beta 3              | -0.1       |     | IMPORTIN BETA-3 (PTHR10527:SF5)                                         |
| BKN22066        | FBgn0038473        | FBgn0038473        | CG3983        | ns1        | nucleostemin 1                  | -0.1       |     | GTP-BINDING PROTEIN-INVERTEBRATE (PTHR11089:SF12)                       |
| BKN29439        | FBgn0027497        | FBgn0027497        | CG1098        | Madm       | MLF1-adaptor molecule           | 0.0        |     | NUCLEAR RECEPTOR BINDING PROTEIN-RELATED (PTHR13902:SF9)                |
| BKN29692        | FBgn0052670        | FBgn0052670        | CG32670       | Rab9Fb     | Rab GTPase 9Fb                  | 0.0        |     | RAB, DROSOPHILA (PTHR11708:SF204)                                       |
| BKN32434        | FBgn0085426        | FBgn0085426        | CG34397       | Rgk3       | Rgk3                            | 0.0        |     | GTPASE RAB-RELATED (PTHR11708:SF304)                                    |
| BKN28160        | FBgn0015791        | FBgn0015791        | CG4212        | Rab14      | Rab-protein 14                  | 0.0        |     | RAS-RELATED PROTEIN RAB-14 (PTHR11708:SF248)                            |
| BKN22576        | FBgn0039466        | FBgn0039466        | CG5521        | CG5521     | -                               | 0.0        |     | TUBERIN (PTHR10063)                                                     |
| BKN22355        | FBgn0033038        | FBgn0033038        | CG7791        | CG7791     | -                               | 0.0        |     | MITOCHONDRIAL INTERMEDIATE PEPTIDASE (PTHR11804:SF5)                    |
| <b>BKN28147</b> | <b>FBgn0026597</b> | <b>FBgn0026597</b> | <b>CG7926</b> | <b>Axn</b> | <b>Axin</b>                     | <b>0.0</b> |     |                                                                         |
| BKN22387        | FBgn0035762        | FBgn0035762        | CG8605        | CG8605     | -                               | 0.0        |     | RAD50-INTERACTING PROTEIN 1 (PROTEIN RINT-1) (PTHR13520)                |
| BKN27052        | FBgn0031441        | FBgn0031441        | CG9962        | CG9962     | -                               | 0.0        |     | CASEIN KINASE (PTHR11909:SF18)                                          |
| BKN28399        | FBgn0040512        | FBgn0040512        | CG3948        | zetaCOP    | zetaCOP                         | 0.0        | Yes | ZETA-COAT PROTEIN (PTHR11043)                                           |
| BKN26260        | FBgn0037828        | FBgn0037828        | CG14690       | tomboy20   | tomboy20                        | 0.0        |     | MITOCHONDRIAL IMPORT RECEPTOR SUBUNIT TOM20 (PTHR12430)                 |
| BKN29285        | FBgn0039753        | FBgn0260860        | CG1359        | Bet5       | -                               | 0.0        |     | TRAFFICKING PROTEIN PARTICLE COMPLEX SUBUNIT 1 (PTHR23249:SF9)          |
| BKN25805        | FBgn0037789        | FBgn0037789        | CG6208        | CG6208     | -                               | 0.0        |     | GAMMA-SOLUBLE NSF ATTACHMENT PROTEIN (SNAP-GAMMA) (PTHR13768:SF2)       |
| BKN23808        | FBgn0026179        | FBgn0026179        | CG32434       | siz        | schizo                          | 0.0        |     | BREFELDIN RESISTANT ARF-GEF 2B ISOFORM (PTHR10663:SF12)                 |
| BKN20917        | FBgn0028327        | FBgn0028327        | CG32701       | l(1)G0320  | lethal (1) G0320                | 0.0        |     | TRANSLOCON-ASSOCIATED PROTEIN, ALPHA SUBUNIT (PTHR12924)                |
| BKN20826        | FBgn0038274        | FBgn0038274        | CG7262        | CG7262     | -                               | 0.0        | Yes | NUCLEAR PORE COMPLEX PROTEIN NUP93 (PTHR11225)                          |
| BKN27973        | FBgn0032020        | FBgn0032020        | CG7787        | CG7787     | -                               | 0.0        |     | GUANINE NUCLEOTIDE EXCHANGE FACTOR MSS4 (PTHR13276)                     |
| BKN20039        | FBgn0034155        | FBgn0034155        | CG8566        | unc-104    | unc-104                         | 0.0        |     | KINESIN-LIKE PROTEIN KIF1 (PTHR16012:SF104)                             |

|          |             |             |         |             |                                    |     |                                                                                 |
|----------|-------------|-------------|---------|-------------|------------------------------------|-----|---------------------------------------------------------------------------------|
| BKN20379 | FBgn0035602 | FBgn0260856 | CG4780  | membrin     | -                                  | 0.0 | MEMBRIN (PTHR21230:SF1)                                                         |
| BKN27406 | FBgn0035141 | FBgn0035141 | CG13892 | Cypl        | Cyclophilin-like                   | 0.0 | PEPTIDYL-PROLYL CIS-TRANS ISOMERASE-LIKE 1, PPIL1 (PTHR11071:SF41)              |
| BKN28454 | FBgn0010638 | FBgn0010638 | CG10130 | Sec61beta   | Sec61beta                          | 0.0 | Yes SEC61BETA-PROV PROTEIN (PTHR13509)                                          |
| BKN23346 | FBgn0051342 | FBgn0051342 | CG31342 | CG31342     | -                                  | 0.0 | SYNTENIN 1 (PTHR12345:SF3)                                                      |
| BKN20029 | FBgn0053139 | FBgn0053139 | CG33139 | Ranbp11     | Ranbp11                            | 0.0 | IMPORTIN 11 (IMP11) (RAN-BINDING PROTEIN 11) (PTHR10997:SF7)                    |
| BKN30277 | FBgn0039347 | FBgn0039347 | CG5071  | CG5071      | -                                  | 0.0 | PEPTIDYL-PROLYL CIS-TRANS ISOMERASE (CYCLOPHILIN) (PTHR11071:SF2)               |
| BKN29366 | FBgn0038401 | FBgn0038401 | CG5916  | CG5916      | -                                  | 0.0 | GH REGULATED TBC PROTEIN-1 (PTHR22957:SF54)                                     |
| BKN21330 | FBgn0034109 | FBgn0034109 | CG7747  | CG7747      | -                                  | 0.0 | PEPTIDYL-PROLYL CIS-TRANS ISOMERASE-LIKE 2, PPIL2 (PTHR11071:SF42)              |
| BKN28557 | FBgn0086656 | FBgn0086656 | CG8055  | shrb        | shrub                              | 0.0 | SNF7 - RELATED (PTHR22761)                                                      |
| BKN20932 | FBgn0034585 | FBgn0034585 | CG4030  | CG4030      | -                                  | 0.1 | EARLY ENDOSOME ANTIGEN 1 (PTHR23164)                                            |
| BKN22582 | FBgn0024833 | FBgn0024833 | CG9388  | AP-47       | AP-47                              | 0.1 | CLATHRIN COAT ASSEMBLY PROTEIN AP-1 (PTHR11998:SF11)                            |
| BKN29128 | FBgn0032812 | FBgn0032812 | CG10263 | CG10263     | -                                  | 0.1 | E-CADHERIN BINDING PROTEIN E7-RELATED (PTHR13480)                               |
| BKN22566 | FBgn0024992 | FBgn0024992 | CG2658  | CG2658      | -                                  | 0.1 | PARAPLEGIN (PTHR23076:SF7)                                                      |
| BKN22043 | FBgn0008635 | FBgn0008635 | CG6223  | betaCop     | beta-coatomer protein              | 0.1 | COATOMER BETA SUBUNIT (PTHR10635)                                               |
| BKN21630 | FBgn0034058 | FBgn0034058 | CG8315  | CG8315      | -                                  | 0.1 | PEROXISOMAL BIOGENESIS FACTOR 11- RELATED (PTHR12652:SF8)                       |
| BKN21600 | FBgn0030669 | FBgn0030669 | CG9240  | CG9240      | -                                  | 0.1 | MITOCHONDRIAL INNER MEMBRANE PROTEASE SUBUNIT 1 (PTHR12383:SF2)                 |
| BKN25220 | FBgn0052396 | FBgn0052396 | CG32396 | CG32396     | -                                  | 0.1 | TUBULIN BETA CHAIN (PTHR11588:SF9)                                              |
| BKN29701 | FBgn0259246 | FBgn0259246 | CG42344 | brp         | bruchpilot                         | 0.1 | RAB6-INTERACTING PROTEIN 2/ELKS/ERC/CAST (PTHR18861)                            |
| BKN21387 | FBgn0032243 | FBgn0032243 | CG5300  | Klp31E      | Klp31E                             | 0.1 | KIF21 (PTHR16012:SF173)                                                         |
| BKN28990 | FBgn0024921 | FBgn0024921 | CG7398  | Trn         | Transportin                        | 0.1 | IMPORTIN BETA-2 (PTHR10527:SF3)                                                 |
| BKN25502 | FBgn0032188 | FBgn0032188 | CG13137 | CG13137     | -                                  | 0.1 | ALADIN/ADRACALIN/AAAS (PTHR14494)                                               |
| BKN27773 | FBgn0000330 | FBgn0000330 | CG3035  | cm          | carmine                            | 0.1 | CLATHRIN COAT ADAPTOR AP3 MEDIUM CHAIN (PTHR11998:SF4)                          |
| BKN23991 | FBgn0039335 | FBgn0039335 | CG5127  | Vps33B      | Vacuolar protein sorting 33B       | 0.1 | VACUOLAR PROTEIN SORTING (VPS33) (PTHR11679:SF1)                                |
| BKN24683 | FBgn0085443 | FBgn0085443 | CG34414 | spri        | sprint                             | 0.1 | RAS INTERACTION/INTERFERENCE PROTEIN 1, 2, 3 (PTHR23101:SF3)                    |
| BKN28047 | FBgn0027868 | FBgn0027868 | CG6743  | Nup107      | Nup107                             | 0.1 | NUP107-RELATED (PTHR13003)                                                      |
| BKN24905 | FBgn0038018 | FBgn0038018 | CG10090 | Tim17a1     | Tim17a1                            | 0.1 | MITOCHONDRIAL INNER MEMBRANE TRANSLOCASE SUBUNIT TIM17 (PTHR10485)              |
| BKN20005 | FBgn0015933 | FBgn0261397 | CG2146  | didum       | dilute class unconventional myos   | 0.1 | MYOSIN V (PTHR13140:SF32)                                                       |
| BKN21030 | FBgn0030724 | FBgn0030724 | CG9212  | Nipsnap     | Nipsnap                            | 0.1 | NIPSNAP 2 (PTHR21017:SF5)                                                       |
| BKN26937 | FBgn0031140 | FBgn0031140 | CG12092 | NPC1b       | NPC1b                              | 0.1 | NIEMANN-PICK C1 (PTHR10796:SF35)                                                |
| BKN32629 | FBgn0037798 | FBgn0037798 | CG12817 | CG12817     | -                                  | 0.1 | MULTIPLE COAGULATION FACTOR DEFICIENCY PROTEIN 2 (PTHR23104)                    |
| BKN22546 | FBgn0031955 | FBgn0031955 | CG14535 | CG14535     | -                                  | 0.1 | KINESIN-RELATED PROTEIN (PTHR16012:SF199)                                       |
| BKN31178 | FBgn0039900 | FBgn0039900 | CG2381  | Syt7        | Syt7                               | 0.1 | gb def: CG2381-PA, isoform A (Cg2381-pb, isoform b) (RE44043p) (PTHR10024:SF30) |
| BKN27578 | FBgn0028382 | FBgn0028382 | CG4886  | cyp33       | cyclophilin-33                     | 0.1 | PEPTIDYL-PROLYL CIS-TRANS ISOMERASE E, PPIE (PTHR11071:SF72)                    |
| BKN23244 | FBgn0032520 | FBgn0032520 | CG10859 | CG10859     | -                                  | 0.2 | AXONEMAL DYNEIN INTERMEDIATE CHAIN (PTHR12442:SF7)                              |
| BKN22264 | FBgn0035756 | FBgn0035756 | CG32381 | unc-13-4A   | unc-13-4A                          | 0.2 | MUNC13-4 (PTHR15015:SF1)                                                        |
| BKN28226 | FBgn0011509 | FBgn0011509 | CG33162 | SrpRbeta    | Signal recognition particle recept | 0.2 | SIGNAL RECOGNITION PARTICLE RECEPTOR BETA SUBUNIT RELATED (PTHR19326)           |
| BKN29882 | FBgn0035693 | FBgn0035693 | CG8219  | CG8219      | -                                  | 0.2 | IMPORTIN BETA-2 (PTHR10527:SF3)                                                 |
| BKN26671 | FBgn0087040 | FBgn0087040 | CG8308  | alphaTub67C | alpha-Tubulin at 67C               | 0.2 | TUBULIN ALPHA CHAIN (PTHR11588:SF10)                                            |
| BKN32102 | FBgn0051118 | FBgn0051118 | CG31118 | RabX4       | RabX4                              | 0.2 | RAS-LIKE GTP-BINDING PROTEIN-RELATED (PTHR11708:SF235)                          |
| BKN32184 | FBgn0053555 | FBgn0053555 | CG33555 | btsz        | bitesize                           | 0.2 | BITESIZE ISOFORM (PTHR10024:SF12)                                               |
| BKN21173 | FBgn0024320 | FBgn0024320 | CG5722  | Npc1a       | Niemann-Pick type C-1a             | 0.2 | NIEMANN-PICK C1 (PTHR10796:SF35)                                                |
| BKN21681 | FBgn0028401 | FBgn0028401 | CG9474  | Snap24      | Synapse protein 24                 | 0.2 | SYNAPTOSOMAL ASSOCIATED PROTEIN (PTHR19305)                                     |
| BKN33637 | FBgn0053555 | FBgn0053555 | CG33555 | btsz        | bitesize                           | 0.2 | BITESIZE ISOFORM (PTHR10024:SF12)                                               |
| BKN30135 | FBgn0061200 | FBgn0061200 | CG4453  | Nup153      | Nup153                             | 0.2 | NUCLEAR PORE COMPLEX PROTEIN NUP153 (PTHR23193:SF4)                             |
| BKN25262 | FBgn0016983 | FBgn0016983 | CG8571  | smid        | smallminded                        | 0.2 | NUCLEAR VALOSIN-CONTAINING PROTEIN-LIKE (PTHR23077:SF16)                        |
| BKN21493 | FBgn0031921 | FBgn0260486 | CG42533 | CG42533     | -                                  | 0.2 | DOCK-9, 10, 11 (PTHR23317:SF26)                                                 |
| BKN20773 | FBgn0032476 | FBgn0032476 | CG5439  | CG5439      | -                                  | 0.2 | KINESIN-LIKE PROTEIN KIF4 (PTHR16012:SF200)                                     |
| BKN26808 | FBgn0015831 | FBgn0015831 | CG1279  | Rtnl2       | Rtnl2                              | 0.2 | RETICULON-RELATED (PTHR10994:SF18)                                              |
| BKN27707 | FBgn0039020 | FBgn0039020 | CG17141 | CG17141     | -                                  | 0.2 | GTP-BINDING PROTEIN-RELATED (PTHR11089:SF4)                                     |
| BKN22276 | FBgn0034792 | FBgn0034792 | CG3499  | CG3499      | -                                  | 0.2 | CELL DIVISION PROTEIN FTSH HOMOLOG (PTHR23076:SF10)                             |
| BKN28677 | FBgn0259246 | FBgn0259246 | CG42344 | brp         | bruchpilot                         | 0.2 | RAB6-INTERACTING PROTEIN 2/ELKS/ERC/CAST (PTHR18861)                            |
| BKN22067 | FBgn0036920 | FBgn0036920 | CG8004  | CG8004      | -                                  | 0.2 | METAXIN 2 (PTHR12289:SF11)                                                      |

|          |             |                         |         |            |                                |     |     |                                                                        |
|----------|-------------|-------------------------|---------|------------|--------------------------------|-----|-----|------------------------------------------------------------------------|
| BKN21292 | FBgn0036882 | FBgn0036882             | CG9279  | CG9279     | -                              | 0.2 |     | DYNACTIN 1 (PTHR18916:SF2)                                             |
| BKN21704 | FBgn0024509 | FBgn0024509             | CG6773  | sec13      | sec13                          | 0.3 |     | PROTEIN TRANSPORT PROTEIN SEC13 (PTHR11024:SF2)                        |
| BKN22767 | FBgn0052350 | FBgn0052350             | CG32350 | CG32350    | -                              | 0.3 |     | VACUOLAR MEMBRANE PROTEIN PEP5, 11 (PTHR23323:SF24)                    |
| BKN21113 | FBgn0030753 | FBgn0030753             | CG4420  | CG4420     | -                              | 0.3 |     | DNA-DAMAGE INDUCIBLE PROTEIN DDI1 (V-SNARE-MASTER 1) (PTHR12917:SF1)   |
| BKN22660 | FBgn0031710 | FBgn0031710             | CG7371  | CG7371     | -                              | 0.3 |     | VACUOLAR PROTEIN SORTING 52 (PTHR14190:SF5)                            |
| BKN27571 | FBgn0005586 | FBgn0005586             | CG7576  | Rab3       | Rab-protein 3                  | 0.3 |     | RAS-RELATED PROTEIN RAB-3 (PTHR11708:SF222)                            |
| BKN30823 | FBgn0035366 | FBgn0035366             | CG16976 | CG16976    | -                              | 0.3 |     | RAB3 INTERACTING MOLECULE-RELATED (PTHR12157:SF5)                      |
| BKN28723 | FBgn0028341 | FBgn0028341             | CG32697 | l(1)G0232  | lethal (1) G0232               | 0.3 |     | PROTEIN-TYROSINE PHOSPHATASE N9 (PTHR19134:SF76)                       |
| BKN20157 | FBgn0025742 | FBgn0025742             | CG9115  | mtm        | myotubularin                   | 0.3 |     | MTM1, MTMR1,2 (PTHR10807:SF7)                                          |
| BKN28034 | FBgn0034913 | FBgn0034913             | CG11173 | usnp       | ubisnap                        | 0.3 |     | SYNAPTOSOMAL ASSOCIATED PROTEIN (PTHR19305)                            |
| BKN21990 | FBgn0029512 | FBgn0029512             | CG12276 | Aos1       | Aos1                           | 0.3 |     | SUMO-1-ACTIVATING ENZYME E1A (PTHR10953:SF30)                          |
| BKN28039 | FBgn0031106 | FBgn0031106             | CG1467  | Syx16      | Syntaxin 16                    | 0.3 |     | SYNTAXIN 16 (PTHR19957:SF5)                                            |
| BKN29851 | FBgn0014018 | FBgn0014018             | CG11992 | Rel        | Relish                         | 0.3 |     | NUCLEAR FACTOR NF-KAPPA-B P110 SUBUNIT (PTHR18958:SF235)               |
| BKN21603 | FBgn0032052 | FBgn0032052             | CG13089 | CG13089    | -                              | 0.3 |     | GPI TRANSAMIDASE COMPONENT PIG-U (PTHR13121)                           |
| BKN21874 | FBgn0029964 | FBgn0029964             | CG1409  | CG1409     | -                              | 0.3 |     | MITOCHONDRIA ASSOCIATED GRANULOCYTE MOLECULE (PTHR12388)               |
| BKN28519 | FBgn0025617 | FBgn0260855             | CG7359  | Sec22      | -                              | 0.3 |     | SNARE PROTEIN SEC22 (PTHR21136:SF4)                                    |
| BKN29256 | FBgn0032060 | FBgn0260861             | CG9298  | Trs23      | -                              | 0.3 | Yes | SYNBINDIN (PTHR23249:SF2)                                              |
| BKN27576 | FBgn0033452 | FBgn0033452             | CG1599  | CG1599     | -                              | 0.3 |     | VAMP-7 (PTHR21136:SF8)                                                 |
| BKN27928 | FBgn0250791 | FBgn0250791             | CG6625  | Snap       | Soluble NSF attachment protein | 0.3 |     | ALPHA-SOLUBLE NSF ATTACHMENT PROTEIN (SNAP-ALPHA) (PTHR13768:SF8)      |
| BKN30076 | FBgn0037325 | FBgn0037325             | CG12147 | CG12147    | -                              | 0.4 |     | CASEIN KINASE (PTHR11909:SF18)                                         |
| BKN25982 | FBgn0026313 | FBgn0026313             | CG5675  | X11L       | X11L                           | 0.4 | Yes | AMYLOID BETA A4 PROTEIN RELATED (PTHR12345:SF2)                        |
| BKN21894 | FBgn0011745 | FBgn0011745             | CG6174  | Arp87C     | Actin-related protein 87C      | 0.4 |     | ACTIN-RELATED PROTEIN (PTHR11937:SF46)                                 |
| BKN29421 | FBgn0031600 | FBgn0031600             | CG3652  | CG3652     | -                              | 0.4 |     | YIP1-RELATED (PTHR21236:SF1)                                           |
| BKN20713 | FBgn0038683 | FBgn0038683             | CG11779 | CG11779    | -                              | 0.4 |     | MITOCHONDRIAL INNER MEMBRANE TRANSLOCASE SUBUNIT TIM44 (PTHR10721:SF1) |
| BKN21663 | FBgn0036643 | FBgn0036643             | CG4109  | Syx8       | Syntaxin 8                     | 0.4 |     | SYNTAXIN 8 (PTHR12380:SF6)                                             |
| BKN20261 | FBgn0033812 | FBgn0033812             | CG4663  | CG4663     | -                              | 0.4 |     | PEROXISOMAL MEMBRANE PROTEIN PEX13 (PTHR19332)                         |
| BKN30235 | FBgn0039157 | FBgn0039157             | CG5501  | Myo95E     | Myosin 95E                     | 0.4 |     | UNCONVENTIONAL MYOSIN 95E ISOFORM (PTHR13140:SF17)                     |
| BKN28985 | FBgn0030792 | FBgn0030792             | CG4789  | CG4789     | -                              | 0.4 |     | RAB, MEMBER OF RAS ONCOGENE FAMILY (PTHR11708:SF276)                   |
| BKN23989 | FBgn0000121 | FBgn0000121             | CG5962  | Arr2       | Arrestin 2                     | 0.4 |     | PHOSRESTIN I (ARRESTIN B) (ARRESTIN 2) (PTHR11792:SF4)                 |
| BKN22275 | FBgn0039152 | FBgn0039152             | CG6129  | CG6129     | -                              | 0.4 |     | GOLGI COMPLEX-ASSOCIATED PROTEIN OF 170 KDA (GCP170) (PTHR23159:SF4)   |
| BKN21193 | FBgn0014411 | FBgn0014411             | CG14804 | Vps26      | Vacuolar protein sorting 26    | 0.4 |     | VACUOLAR PROTEIN SORTING 26, VPS26 (PTHR12233:SF1)                     |
| BKN31455 | FBgn0259246 | FBgn0259246             | CG42344 | brp        | bruchpilot                     | 0.4 |     | RAB6-INTERACTING PROTEIN 2/ELKS/ERC/CAST (PTHR18861)                   |
| BKN21940 | FBgn0027518 | FBgn0027518             | CG7609  | CG7609     | -                              | 0.4 |     | PEROXISOMAL TARGETING SIGNAL 2 RECEPTOR (PTHR22850:SF4)                |
| BKN27728 | FBgn0004432 | FBgn0004432             | CG9916  | Cyp1       | Cyclophilin 1                  | 0.4 |     | PEPTIDYL-PROLYL CIS-TRANS ISOMERASE F, PPIF (PTHR11071:SF73)           |
| BKN22537 | FBgn0086347 | FBgn0086347             | CG7438  | Myo31DF    | Myosin 31DF                    | 0.4 |     | MYOSIN I (PTHR13140:SF31)                                              |
| BKN20130 | FBgn0035540 | FBgn0035540             | CG7452  | Syx17      | Syntaxin 17                    | 0.4 |     | SYNTAXIN 17 (PTHR19957:SF1)                                            |
| BKN32988 | FBgn0038205 | FBgn0038205             | CG9913  | Kif19A     | Kif19A                         | 0.4 |     | KINESIN-RELATED (PTHR16012:SF50)                                       |
| BKN28653 | FBgn0004242 | FBgn0004242             | CG3139  | Syt1       | Synaptotagmin 1                | 0.5 |     | SYNAPTOTAGMIN, INSECTS (PTHR10024:SF38)                                |
| BKN30793 | FBgn0003889 | FBgn0003889             | CG9359  | betaTub85D | beta-Tubulin at 85D            | 0.5 |     | TUBULIN BETA CHAIN (PTHR11588:SF9)                                     |
| BKN28971 | FBgn0034446 | FBgn0034446             | CG7735  | CG7735     | -                              | 0.5 |     | ADP-RIBOSYLATION FACTOR-LIKE 6, ARL6 (PTHR11711:SF21)                  |
| BKN31128 | FBgn0033067 | FBgn0033067             | CG11211 | CG11211    | -                              | 0.5 |     | MACROPHAGE MANNOSE RECEPTOR (PTHR22803:SF17)                           |
| BKN30480 | FBgn0031254 | FBgn0031254             | CG13692 | CG13692    | -                              | 0.5 |     | ADP-RIBOSYLATION FACTOR-LIKE, ARL (PTHR11711:SF10)                     |
| BKN28841 | FBgn0032191 | FBgn0032191             | CG5734  | CG5734     | -                              | 0.5 |     | gb def: CG5734-PA (LD15323p) (PTHR12431:SF3)                           |
| BKN21991 | FBgn0019968 | FBgn0019968             | CG8183  | Khc-73     | Kinesin-73                     | 0.5 |     | KINESIN-73 (PTHR16012:SF67)                                            |
| BKN29365 | FBgn0037551 | FBgn0037551             | CG7891  | Gie        | novel GTPase indispensable for | 0.5 |     | ADP-RIBOSYLATION FACTOR-LIKE 10, ARL10 (PTHR11711:SF20)                |
| BKN22534 | FBgn0040206 | FBgn0040206             | CG1487  | krz        | kurtz                          | 0.5 |     | BETA-ARRESTIN 1, 2 (PTHR11792:SF5)                                     |
| BKN32041 | FBgn0259210 | FBgn0259210             | CG42310 | prom       | prominin                       | 0.5 |     | PROMININ (PROM) PROTEIN (PTHR22730)                                    |
| BKN20382 | FBgn0011741 | FBgn0011741             | CG11678 | Actr13E    | Actin-related protein 13E      | 0.5 |     | ACTIN-LIKE PROTEIN (PTHR11937:SF21)                                    |
| BKN33589 | FBgn0016976 | FBgn0016975&FBgn0016976 | CG12500 | stnA       | stoned A                       | 0.5 |     | STONED-RELATED (PTHR11998:SF1)                                         |
| BKN32515 | FBgn0052683 | FBgn0052683             | CG32683 | CG32683    | -                              | 0.5 |     | ARRESTIN-RELATED (PTHR11792:SF1)                                       |
| BKN21582 | FBgn0086685 | FBgn0086685             | CG2095  | sec8       | sec8                           | 0.6 |     | EXOCYST COMPONENT SEC8 (PTHR14146)                                     |
| BKN22180 | FBgn0015794 | FBgn0015794             | CG3129  | Rab-RP4    | Rab-related protein 4          | 0.6 |     | RAS-RELATED PROTEIN RAB-18 (PTHR11708:SF245)                           |



|          |             |             |         |               |                                   |     |     |                                                                        |
|----------|-------------|-------------|---------|---------------|-----------------------------------|-----|-----|------------------------------------------------------------------------|
| BKN21043 | FBgn0004387 | FBgn0004387 | CG5658  | Klp98A        | Kinesin-like protein at 98A       | 0.6 |     | KINESIN-LIKE PROTEIN KIF14, KIF16 (PTHR16012:SF178)                    |
| BKN29279 | FBgn0086372 | FBgn0086372 | CG2520  | lap           | like-AP180                        | 0.6 |     | PHOSPHATIDYLINOSITOL-BINDING CLATHRIN ASSEMBLY PROTEIN (PTHR22951:SF3) |
| BKN20810 | FBgn0000986 | FBgn0000986 | CG2637  | Fs(2)Ket      | Female sterile (2) Ketel          | 0.6 | Yes | IMPORTIN BETA-1 (PTHR10527:SF1)                                        |
| BKN28126 | FBgn0013750 | FBgn0013750 | CG8156  | Arf51F        | ADP ribosylation factor 51F       | 0.6 | Yes | ADP-RIBOSYLATION FACTOR, ARF (PTHR11711:SF30)                          |
| BKN27892 | FBgn0030276 | FBgn0030276 | CG1938  | Dlic          | Dynein light intermediate chain   | 0.6 |     | DYNEIN LIGHT INTERMEDIATE CHAIN (PTHR12688)                            |
| BKN31728 | FBgn0024980 | FBgn0024980 | CG2715  | Syx4          | Syntaxin 4                        | 0.6 |     | SYNTAXIN 4, INSECT (PTHR19957:SF19)                                    |
| BKN20315 | FBgn0010660 | FBgn0010660 | CG3820  | Nup214        | Nup214                            | 0.6 |     | NUCLEAR PORE COMPLEX PROTEIN NUP214 (PTHR23193:SF2)                    |
| BKN20255 | FBgn0029959 | FBgn0029959 | CG12156 | Rab39         | Rab39                             | 0.6 |     | RAS-RELATED PROTEIN RAB-39 (PTHR11708:SF250)                           |
| BKN20162 | FBgn0040087 | FBgn0040087 | CG1422  | p115          | p115                              | 0.6 |     | VESICLE DOCKING PROTEIN P115 (PTHR10013)                               |
| BKN28484 | FBgn0016041 | FBgn0016041 | CG12157 | Tom40         | Translocase of outer membrane     | 0.6 |     | MITOCHONDRIAL IMPORT RECEPTOR SUBUNIT TOM40 (PTHR10802)                |
| BKN23282 | FBgn0026189 | FBgn0026189 | CG7740  | prominin-like | prominin-like                     | 0.6 |     | PROMININ (PROM) PROTEIN (PTHR22730)                                    |
| BKN28950 | FBgn0003884 | FBgn0003884 | CG1913  | alphaTub84B   | alpha-Tubulin at 84B              | 0.6 |     | TUBULIN ALPHA CHAIN (PTHR11588:SF10)                                   |
| BKN29577 | FBgn0259246 | FBgn0259246 | CG42344 | brp           | bruchpilot                        | 0.6 |     | RAB6-INTERACTING PROTEIN 2/ELKS/ERC/CAST (PTHR18861)                   |
| BKN22450 | FBgn0035892 | FBgn0035892 | CG7127  | exo70         | exo70                             | 0.6 |     | EXOCYST COMPLEX PROTEIN EXO70 (PTHR12542:SF7)                          |
| BKN22714 | FBgn0035922 | FBgn0035922 | CG6486  | CG6486        | -                                 | 0.7 |     | PEROXISOMAL TARGETING SIGNAL 2 RECEPTOR (PTHR22850:SF4)                |
| BKN27695 | FBgn0002567 | FBgn0002567 | CG8024  | ltd           | lightoid                          | 0.7 |     | RAS-RELATED PROTEIN RAB-32 AND 38 (PTHR11708:SF264)                    |
| BKN20245 | FBgn0033339 | FBgn0033339 | CG8266  | sec31         | sec31                             | 0.7 |     | SEC31 (PTHR13923:SF3)                                                  |
| BKN32162 | FBgn0035364 | NA          | NA      | NA            | NA                                | 0.7 |     | REGULATING SYNAPTIC MEMBRANE EXOCYTOSIS PROTEIN (PTHR12157:SF4)        |
| BKN28150 | FBgn0033264 | FBgn0033264 | CG2158  | CG2158        | -                                 | 0.7 |     | NUCLEOPORIN 50 (PTHR13118)                                             |
| BKN28806 | FBgn0003887 | FBgn0003887 | CG9277  | betaTub56D    | beta-Tubulin at 56D               | 0.7 |     | TUBULIN BETA CHAIN (PTHR11588:SF9)                                     |
| BKN28766 | FBgn0086779 | FBgn0086779 | CG11628 | step          | steppke                           | 0.7 |     | CYTOHESIN (GUANINE NUCLEOTIDE-EXCHANGE PROTEIN) (PTHR10663:SF13)       |
| BKN33360 | FBgn0030755 | FBgn0030755 | CG9906  | CG9906        | -                                 | 0.7 |     | CALNEXIN (PTHR11073:SF1)                                               |
| BKN21670 | FBgn0036195 | FBgn0036195 | CG6053  | CG6053        | -                                 | 0.7 |     | AXONEMAL DYNEIN INTERMEDIATE CHAIN (PTHR12442:SF7)                     |
| BKN21699 | FBgn0010235 | FBgn0010235 | CG5433  | Klc           | Kinesin light chain               | 0.7 |     | KINESIN LIGHT CHAIN 1, 2, 8 (PTHR19959:SF20)                           |
| BKN28556 | FBgn0015797 | FBgn0015797 | CG6601  | Rab6          | Rab-protein 6                     | 0.7 |     | RAS-RELATED PROTEIN RAB-6 (PTHR11708:SF256)                            |
| BKN27774 | FBgn0015793 | FBgn0015793 | CG7062  | Rab-RP3       | Rab-related protein 3             | 0.7 |     | RAS-RELATED PROTEIN RAB-19 (PTHR11708:SF242)                           |
| BKN22053 | FBgn0033109 | FBgn0033109 | CG9446  | coro          | coro                              | 0.7 |     | CORONIN (PTHR10856)                                                    |
| BKN21996 | FBgn0029976 | FBgn0029976 | CG1514  | CG1514        | -                                 | 0.7 |     | SORTING NEXIN 25 (PTHR22775:SF6)                                       |
| BKN21971 | FBgn0015816 | FBgn0015816 | CG3539  | Slh           | SLY-1 homologous                  | 0.8 |     | SLY1-RELATED (PTHR11679:SF2)                                           |
| BKN27602 | FBgn0015277 | FBgn0015277 | CG5373  | Pi3K59F       | Phosphatidylinositol 3 kinase 59F | 0.8 |     | PHOSPHATIDYLINOSITOL 3-KINASE CLASS 3 (PTHR10048:SF7)                  |
| BKN23079 | FBgn0038574 | FBgn0261532 | CG7212  | cdm           | cadmus                            | 0.8 |     | IMPORTIN 13 (PTHR12363:SF6)                                            |
| BKN25419 | FBgn0035202 | FBgn0035202 | CG9139  | CG9139        | -                                 | 0.8 |     | RAB5 GDP/GTP EXCHANGE FACTOR (RABEX-5) (PTHR23101:SF2)                 |
| BKN21130 | FBgn0026207 | FBgn0026207 | CG6819  | mbo           | members only                      | 0.8 |     | NUCLEOPORIN NUP84-RELATED (PTHR13257)                                  |
| BKN27930 | FBgn0024889 | FBgn0024889 | CG8548  | Kap-alpha1    | karyopherin alpha1                | 0.8 |     | IMPORTIN ALPHA (PTHR23316)                                             |
| BKN28425 | FBgn0034535 | FBgn0034535 | CG11110 | CG11110       | -                                 | 0.8 |     | MITOCHONDRIAL INNER MEMBRANE PROTEASE SUBUNIT 2 (PTHR12383:SF3)        |
| BKN23013 | FBgn0032465 | FBgn0032465 | CG12404 | CG12404       | -                                 | 0.8 |     | GOLGI MEMBRANE PROTEIN SB140 (YIP1B) (PTHR21236:SF2)                   |
| BKN21801 | FBgn0031456 | FBgn0031456 | CG2848  | Trn-SR        | Transportin-Serine/Arginine rich  | 0.8 | Yes | TRANSPORTIN 3 (PTHR12363:SF5)                                          |
| BKN27403 | FBgn0040340 | FBgn0040340 | CG11642 | TRAM          | TRAM                              | 0.8 |     | TRANSLOCATION ASSOCIATED MEMBRANE PROTEIN, INSECT (PTHR12371:SF2)      |
| BKN22851 | FBgn0031051 | FBgn0031051 | CG12234 | Ranbp21       | Ranbp21                           | 0.8 |     | EXPORTIN 5 (PTHR11223:SF3)                                             |
| BKN28633 | FBgn0005586 | FBgn0005586 | CG7576  | Rab3          | Rab-protein 3                     | 0.8 |     | RAS-RELATED PROTEIN RAB-3 (PTHR11708:SF222)                            |
| BKN22242 | FBgn0000482 | FBgn0000482 | CG3093  | dor           | deep orange                       | 0.9 |     | VACUOLAR MEMBRANE PROTEIN PEP3, 18 (PTHR23323:SF25)                    |
| BKN22979 | FBgn0034744 | FBgn0034744 | CG4071  | Vps20         | Vacuolar protein sorting 20       | 0.9 |     | SNF7 - RELATED (PTHR22761)                                             |
| BKN22944 | FBgn0039379 | FBgn0039379 | CG5886  | CG5886        | -                                 | 0.9 |     | TAXILIN (PTHR16127:SF9)                                                |
| BKN26484 | FBgn0038565 | FBgn0038565 | CG7794  | CG7794        | -                                 | 0.9 |     | TUBULIN ALPHA CHAIN (PTHR11588:SF10)                                   |
| BKN31650 | FBgn0036341 | FBgn0036341 | CG11278 | Syx13         | Syntaxin 13                       | 0.9 |     | SYNTAXIN-RELATED (PTHR19957:SF9)                                       |
| BKN20197 | FBgn0025802 | FBgn0025802 | CG6939  | Sbf           | SET domain binding factor         | 0.9 | Yes | MYOTUBULARIN-RELATED PROTEIN 5, 13 (PTHR10807:SF1)                     |
| BKN21904 | FBgn0035317 | FBgn0035317 | CG13809 | osm-1         | osm-1                             | 0.9 |     | OSM-1 (PTHR15722:SF3)                                                  |
| BKN28479 | FBgn0035165 | FBgn0035165 | CG13887 | CG13887       | -                                 | 0.9 |     | BCR-ASSOCIATED PROTEIN, BAP (PTHR12701:SF3)                            |
| BKN27806 | FBgn0025382 | FBgn0025382 | CG14791 | Rab27         | Rab27                             | 0.9 |     | RAS-RELATED PROTEIN RAB-27 (PTHR11708:SF223)                           |
| BKN34054 | FBgn0085426 | FBgn0085426 | CG34397 | Rgk3          | Rgk3                              | 0.9 |     | GTPASE RAB-RELATED (PTHR11708:SF304)                                   |
| BKN25646 | FBgn0001108 | FBgn0001108 | CG9206  | Gl            | Glued                             | 0.9 |     | DYNACTIN 1 (PTHR18916:SF2)                                             |
| BKN28301 | FBgn0015622 | FBgn0015622 | CG11958 | Cnx99A        | Calnexin 99A                      | 0.9 |     | CALNEXIN (PTHR11073:SF1)                                               |

|          |             |             |         |             |                                  |     |     |                                                                    |
|----------|-------------|-------------|---------|-------------|----------------------------------|-----|-----|--------------------------------------------------------------------|
| BKN21198 | FBgn0037710 | FBgn0037710 | CG9393  | CG9393      | -                                | 0.9 |     | METAXIN 1,3 (PTHR12289:SF16)                                       |
| BKN30694 | FBgn0010097 | FBgn0010097 | CG17566 | gammaTub37C | gamma-Tubulin at 37C             | 0.9 |     | TUBULIN GAMMA CHAIN (PTHR11588:SF7)                                |
| BKN20939 | FBgn0010349 | FBgn0010349 | CG7507  | Dhc64C      | Dynein heavy chain 64C           | 0.9 |     | CYTOPLASMIC DYNEIN HEAVY CHAIN (PTHR10676:SF28)                    |
| BKN25863 | FBgn0027537 | FBgn0027537 | CG11092 | CG11092     | -                                | 0.9 |     | NUCLEAR PORE COMPLEX PROTEIN NUP93 (PTHR11225)                     |
| BKN21557 | FBgn0021795 | FBgn0021795 | CG9035  | Tapdelta    | Translocon-associated protein de | 1.0 |     | TRANSLOCON-ASSOCIATED PROTEIN, DELTA SUBUNIT (PTHR12731)           |
| BKN30427 | FBgn0086913 | FBgn0086913 | CG34410 | Rab26       | Rab26                            | 1.0 |     | RAS-RELATED PROTEIN RAB-37 AND 26 (PTHR11708:SF209)                |
| BKN28684 | FBgn0045866 | FBgn0045866 | CG11785 | bai         | baiser                           | 1.0 | Yes | TRANSMEMBRANE PROTEIN TMP21-RELATED (PTHR22811:SF6)                |
| BKN29087 | FBgn0003654 | FBgn0003654 | CG18000 | sw          | short wing                       | 1.0 |     | DYNEIN INTERMEDIATE CHAIN DHIC 1,2 (PTHR12442:SF22)                |
| BKN27824 | FBgn0020503 | FBgn0020503 | CG5020  | CLIP-190    | Cytoplasmic linker protein 190   | 1.0 |     | RESTIN-LIKE 2 (PTHR18916:SF8)                                      |
| BKN20042 | FBgn0086250 | FBgn0261276 | CG8479  | opa1-like   | optic atrophy 1-like             | 1.0 |     | OPTIC ATROPHY 1-LIKE PROTEIN, OPA1 (PTHR11566:SF8)                 |
| BKN22239 | FBgn0030735 | FBgn0030735 | CG3632  | CG3632      | -                                | 1.0 |     | MYOTUBULARIN-RELATED PROTEIN 3, 4 (PTHR10807:SF5)                  |
| BKN21541 | FBgn0033401 | FBgn0033401 | CG1968  | CG1968      | -                                | 1.0 |     | COMPONENT OF OLIGOMERIC GOLGI COMPLEX 6 (PTHR21506)                |
| BKN28318 | FBgn0034118 | FBgn0034118 | CG6251  | Nup62       | Nup62                            | 1.0 |     | NUCLEAR PORE GLYCOPROTEIN P62-RELATED (PTHR12084)                  |
| BKN25442 | FBgn0035399 | FBgn0035399 | CG14955 | CG14955     | -                                | 1.0 |     | PROMININ (PROM) PROTEIN (PTHR22730)                                |
| BKN27791 | FBgn0243513 | FBgn0243513 | CG17262 | cnir        | cornichon related                | 1.0 |     | ER-DERIVED VESICLES PROTEIN-RELATED (PTHR12290:SF4)                |
| BKN22108 | FBgn0035945 | FBgn0035945 | CG5026  | CG5026      | -                                | 1.0 |     | MYOTUBULARIN-RELATED PROTEIN 9 (PTHR10807:SF9)                     |
| BKN23556 | FBgn0036497 | FBgn0036497 | CG7815  | ran-like    | ran-like                         | 1.0 |     | GTP-BINDING NUCLEAR PROTEIN RAN (PTHR11708:SF269)                  |
| BKN27375 | FBgn0016693 | FBgn0016693 | CG6148  | Past1       | Putative Achaete Scute Target 1  | 1.0 |     | EH DOMAIN CONTAINING/PAST 1, 2, 3 (PTHR11216:SF31)                 |
| BKN23875 | FBgn0053547 | FBgn0053547 | CG33547 | Rim         | Rim                              | 1.0 |     | RAB3 INTERACTING MOLECULE (PTHR12157:SF3)                          |
| BKN25179 | FBgn0038355 | FBgn0038355 | CG4520  | CG4520      | -                                | 1.1 |     | MITOCHONDRIAL IMPORT RECEPTOR SUBUNIT TOM40 (PTHR10802)            |
| BKN21808 | FBgn0025725 | FBgn0025725 | CG7961  | alphaCop    | alpha-coatomer protein           | 1.1 | Yes | COATOMER ALPHA SUBUNIT (PTHR19876:SF1)                             |
| BKN29991 | FBgn0035256 | FBgn0035256 | CG13930 | CG13930     | -                                | 1.1 |     | gb def: CG13930-PA (PTHR12442:SF9)                                 |
| BKN20734 | FBgn0001084 | FBgn0001084 | CG13396 | fy          | fuzzy                            | 1.1 |     | INTRACELLULAR TRAFFIC PROTEIN-RELATED (PTHR13559)                  |
| BKN30490 | FBgn0259210 | FBgn0259210 | CG42310 | prom        | prominin                         | 1.1 |     | PROMININ (PROM) PROTEIN (PTHR22730)                                |
| BKN20478 | FBgn0034243 | FBgn0034243 | CG6501  | ns2         | nucleostemin 2                   | 1.1 | Yes | GTP-BINDING PROTEIN 2 (PTHR11089:SF9)                              |
| BKN28228 | FBgn0033247 | FBgn0033247 | CG8722  | Nup44A      | Nup44A                           | 1.1 |     | NUCLEOPORIN SEH1 (SEC13-LIKE PROTEIN) (PTHR11024:SF3)              |
| BKN31671 | FBgn0015372 | FBgn0015372 | CG3870  | chrw        | chrowded                         | 1.1 |     | RAS-RELATED PROTEIN RAB-5-RELATED (PTHR11708:SF255)                |
| BKN20656 | FBgn0037894 | FBgn0037894 | CG5252  | Ranbp9      | Ranbp9                           | 1.1 |     | IMPORTIN 9 (IMP9) (RAN-BINDING PROTEIN 9) (PTHR10997:SF9)          |
| BKN29102 | FBgn0030122 | FBgn0030122 | CG16892 | CG16892     | -                                | 1.1 |     | ALADIN/ADRACALIN/AAAS (PTHR14494)                                  |
| BKN33913 | FBgn0038829 | FBgn0038829 | CG17271 | CG17271     | -                                | 1.1 |     | MULTIPLE COAGULATION FACTOR DEFICIENCY PROTEIN 2 (PTHR23104)       |
| BKN20861 | FBgn0033206 | FBgn0033206 | CG12042 | CG12042     | -                                | 1.2 |     | DYNACTIN P62 SUBUNIT (PTHR13034)                                   |
| BKN21447 | FBgn0010348 | FBgn0010348 | CG8385  | Arf79F      | ADP ribosylation factor 79F      | 1.2 |     | ADP-RIBOSYLATION FACTOR, ARF (PTHR11711:SF30)                      |
| BKN22344 | FBgn0011744 | FBgn0011744 | CG7558  | Arp66B      | Actin-related protein 66B        | 1.2 |     | ACTIN-LIKE PROTEIN 3, ACL3 (PTHR11937:SF31)                        |
| BKN21048 | FBgn0011708 | FBgn0011708 | CG42114 | Syx5        | Syntaxin 5                       | 1.2 |     | SYNTAXIN 5 (PTHR19957:SF3)                                         |
| BKN21773 | FBgn0027605 | FBgn0027605 | CG6842  | Vps4        | Vacuolar protein sorting 4       | 1.2 |     | SKD/VACUOLAR SORTING (PTHR23074:SF3)                               |
| BKN21378 | FBgn0026378 | FBgn0026378 | CG8432  | Rep         | Rab escort protein               | 1.2 |     | RAB GDP-DISSOCIATION INHIBITOR (PTHR11787)                         |
| BKN28072 | FBgn0015513 | FBgn0015513 | CG10379 | mbc         | myoblast city                    | 1.2 |     | DOCK-1,2,5 (PTHR23317:SF29)                                        |
| BKN22917 | FBgn0003210 | FBgn0003210 | CG11427 | rb          | ruby                             | 1.3 |     | ADAPTER-RELATED PROTEIN COMPLEX 3, BETA SUBUNIT (PTHR11134:SF1)    |
| BKN28490 | FBgn0035027 | FBgn0035027 | CG3511  | CG3511      | -                                | 1.3 |     | PEPTIDYL-PROLYL CIS-TRANS ISOMERASE-LIKE (PTHR11071:SF40)          |
| BKN28332 | FBgn0052392 | FBgn0052392 | CG32392 | CG32392     | -                                | 1.4 |     | FLAGELLAR RADIAL SPOKE PROTEIN 3 (PTHR21648)                       |
| BKN20670 | FBgn0086475 | FBgn0086475 | CG3885  | sec3        | sec3                             | 1.4 |     | EXOCYST COMPLEX COMPONENT SEC3 (PTHR16092:SF1)                     |
| BKN20363 | FBgn0034691 | FBgn0034691 | CG6562  | synj        | synaptojanin                     | 1.4 |     | SYNAPTOJANIN (PTHR11200:SF10)                                      |
| BKN21123 | FBgn0030412 | FBgn0030412 | CG17762 | tomosyn     | tomosyn                          | 1.4 |     | TOMOSYN (PTHR10241:SF7)                                            |
| BKN20375 | FBgn0032880 | FBgn0032880 | CG9318  | CG9318      | -                                | 1.5 |     | TRANSMEMBRANE 9 SUPERFAMILY MEMBER 2 (PTHR10766:SF13)              |
| BKN31557 | FBgn0034312 | FBgn0034312 | CG10916 | CG10916     | -                                | 1.5 |     | ZN/RING FINGER PROTEIN 2 (PTHR22937:SF6)                           |
| BKN28022 | FBgn0028582 | FBgn0028582 | CG8532  | lqf         | liquid facets                    | 1.5 |     | LIQUID FACETS (PTHR12276:SF13)                                     |
| BKN32748 | FBgn0037310 | FBgn0037310 | CG1158  | Tim17b1     | Tim17b1                          | 1.5 |     | MITOCHONDRIAL INNER MEMBRANE TRANSLOCASE SUBUNIT TIM17 (PTHR10485) |
| BKN28910 | FBgn0011742 | FBgn0011742 | CG9901  | Arp14D      | Actin-related protein 14D        | 1.5 |     | ACTIN-RELATED PROTEIN 2, ARP2 (PTHR11937:SF37)                     |
| BKN28713 | FBgn0031882 | FBgn0031882 | CG9100  | Rab30       | Rab30                            | 1.6 |     | RAS-RELATED PROTEIN RAB-30 (PTHR11708:SF244)                       |
| BKN32037 | FBgn0067861 | FBgn0067861 | CG9580  | Sdic1       | Sperm-specific dynein intermedi  | 1.6 |     | DYNEIN INTERMEDIATE CHAIN DHIC 1,2 (PTHR12442:SF22)                |
| BKN29148 | FBgn0034753 | FBgn0034753 | CG2852  | CG2852      | -                                | 1.6 |     | PEPTIDYL-PROLYL CIS-TRANS ISOMERASE (CYCLOPHILIN) (PTHR11071:SF62) |
| BKN21232 | FBgn0028541 | FBgn0028541 | CG7364  | TM9SF4      | -                                | 1.7 | Yes | TRANSMEMBRANE 9 SUPERFAMILY PROTEIN MEMBER 4 (PTHR10766:SF12)      |

|                 |                    |                    |                |                 |                                |             |     |                                                                   |
|-----------------|--------------------|--------------------|----------------|-----------------|--------------------------------|-------------|-----|-------------------------------------------------------------------|
| BKN33351        | FBgn0003660        | FBgn0003660        | CG12210        | Syb             | Synaptobrevin                  | 1.7         |     | SYNAPTOBREVIN (PTHR21136:SF21)                                    |
| BKN22197        | FBgn0039402        | FBgn0039402        | CG14542        | vps2            | vps2                           | 1.7         |     | SNF7-LIKE PROTEIN (BC-2) (PTHR10476:SF4)                          |
| BKN20346        | FBgn0025724        | FBgn0025724        | CG6699         | beta'Cop        | beta'-coatomer protein         | 1.7         | Yes | COATOMER BETA SUBUNIT (PTHR19876:SF2)                             |
| BKN20652        | FBgn0033039        | FBgn0033039        | CG7897         | gp210           | gp210                          | 1.7         |     | NUCLEAR PORE MEMBRANE GLYCOPROTEIN GP210-RELATED (PTHR23019)      |
| BKN22363        | FBgn0023388        | FBgn0023388        | CG1099         | Dap160          | Dynamin associated protein 160 | 1.8         |     | DYNAMIN-ASSOCIATED PROTEIN (PTHR11216:SF25)                       |
| BKN23509        | FBgn0029993        | FBgn0029993        | CG1571         | CG1571          | -                              | 2.1         |     | AXONEMAL DYNEIN INTERMEDIATE CHAIN (PTHR12442:SF7)                |
| BKN22991        | FBgn0014010        | FBgn0014010        | CG3664         | Rab5            | Rab-protein 5                  | 2.2         |     | RAS-RELATED PROTEIN RAB-5 (PTHR11708:SF254)                       |
| BKN22967        | FBgn0024754        | FBgn0024754        | CG8200         | Flo             | flotillin                      | 2.3         |     | FLOTILLIN-1 (PTHR13806:SF8)                                       |
| BKN22645        | FBgn0053180        | FBgn0053180        | CG33180        | Ranbp16         | Ranbp16                        | 2.3         |     | EXPORTIN 7-RELATED / RAN BINDING PROTEIN 16,17 (PTHR12596:SF2)    |
| BKN20365        | FBgn0025716        | FBgn0025716        | CG6546         | Bap55           | Brahma associated protein 55kD | 2.4         |     | ACTIN-LIKE PROTEIN 6, ACL6 (PTHR11937:SF32)                       |
| BKN20730        | FBgn0028968        | FBgn0028968        | CG1528         | gammaCop        | gamma-coatomer protein         | 2.5         | Yes | COATOMER GAMMA SUBUNIT (PTHR10261)                                |
| BKN20229        | FBgn0052677        | FBgn0052677        | CG32677        | X11Lbeta        | X11Lbeta                       | 2.5         |     | AMYLOID BETA A4 PROTEIN RELATED (PTHR12345:SF2)                   |
| BKN28549        | FBgn0020255        | FBgn0020255        | CG1404         | ran             | ran                            | 2.6         |     | GTP-BINDING NUCLEAR PROTEIN RAN (PTHR11708:SF269)                 |
| BKN28986        | FBgn0028969        | FBgn0028969        | CG14813        | deltaCOP        | delta-coatomer protein         | 2.6         | Yes | COATOMER DELTA SUBUNIT (PTHR10121)                                |
| <b>BKN30547</b> | <b>FBgn0002945</b> | <b>FBgn0002945</b> | <b>CG11614</b> | <b>nkd</b>      | <b>naked</b>                   | <b>2.7</b>  |     |                                                                   |
| BKN20869        | FBgn0034258        | FBgn0034258        | CG4954         | eIF3-S8         | eIF3-S8                        | 3.6         |     | EUKARYOTIC TRANSLATION INITIATION FACTOR 3, SUBUNIT 8 (PTHR13937) |
| BKN22633        | FBgn0020497        | FBgn0020497        | CG13387        | emb             | embargoed                      | 4.2         | Yes | EXPORTIN 1 ((PTHR11223:SF2)                                       |
| <b>BKN27574</b> | <b>FBgn0015024</b> | <b>FBgn0015024</b> | <b>CG2028</b>  | <b>Cklalpha</b> | <b>Casein kinase lalpha</b>    | <b>11.3</b> |     |                                                                   |

<sup>a</sup> RNAi reagents designed based on Flybase Release 5.10, <sup>b</sup> calculated targets based on the latest Flybase release 5.25

Wnt/Wg components are indicated in bold. Genes are sorted by phenotypic strength. Viability phenotypes are indicated. RNAi sequence information is available at <http://www.genomernai.org>

**Supplementary Table 2: in vivo RNAi phenotypes of p24 proteins**

|          | <b>opm</b><br>RNAi 1 | <b>opm</b><br>RNAi 2 | <b>CHOp24</b><br>RNAi 1 | <b>CHOp24</b><br>RNAi 2 | <b>p24-1</b><br>RNAi 1 | <b>p24-1</b><br>RNAi 2 | <b>eca</b><br>RNAi 1 | <b>eca</b><br>RNAi 2 | <b>bai</b>     | <b>CG9308</b> | <b>p24-2</b> | <b>CG31787</b> |
|----------|----------------------|----------------------|-------------------------|-------------------------|------------------------|------------------------|----------------------|----------------------|----------------|---------------|--------------|----------------|
| act-Gal4 | lethal               | lethal               | lethal                  | lethal                  | lethal                 | lethal                 | np                   | lethal *             | lethal *       | lethal *      | np           | np             |
| vg-Gal4  | np                   | <b>wmd</b>           | np                      | <b>wmd</b>              | <b>wmd</b>             | np                     | np                   | blisters             | np             | np            | blisters     | np             |
| nub-Gal4 | <b>wmd</b>           | lethal               | np                      | lethal                  | lethal *               | <b>wmd (29)</b>        | np                   | <b>wmd</b>           | unfolded wings | np            | np           | np             |
| wg-Gal4  | np                   | <b>wmd</b>           | np                      | <b>wmd (29)</b>         | <b>wmd</b>             | np                     | np                   | <b>wmd (29)</b>      | np             | np            | np           | np             |

**wmd** wing margin defects/loss of sensory bristles

**np** no phenotype observed

**\*** pupal lethal

All crosses were kept at 25 degrees, unless otherwise indicated.

**Supplementary Table 3: dsRNA template and qPCR primer sequences**

| Gene                                                                                                                                                             | Primer 1                 | Primer 2                      |             |
|------------------------------------------------------------------------------------------------------------------------------------------------------------------|--------------------------|-------------------------------|-------------|
| <b>Gene-specific primers for RNAi probes</b>                                                                                                                     |                          |                               |             |
| GFP                                                                                                                                                              | ACCCTCGTGACCACCCTGACCTAC | GGACCATGTGATCGCGCTTCTCGT      |             |
| Rel                                                                                                                                                              | TTGTGCTCGATAAGTTTGCG     | AATCAATAACCGCAAGTCGG          |             |
| pan                                                                                                                                                              | TTGATGAGCACGGAAGTCAG     | ATTCCCAAGTGACTGAACCG          |             |
| arm                                                                                                                                                              | TTGCTGTTAGAGATGGCACG     | ACGAGGAGATGGAGGGAGAT          |             |
| arr                                                                                                                                                              | CCTTGCACGGATTAACACCT     | TCAGCGAATTGTGGACTCAG          |             |
| evi                                                                                                                                                              | CATCTCGTAGACCAGCGACA     | GAAACGCTGTACTIONCATGCCA       |             |
| wg                                                                                                                                                               | GGAAATCCTCGTCCCCTTTA     | GTTTCTCGTCGAGCAGTTCC          |             |
| fz                                                                                                                                                               | GCTGTGAACCCATCACCATA     | CGCCAACTTTTAGTTCTAG           |             |
| dsh                                                                                                                                                              | ACGAGCGGCTAACACACTG      | GGCGTTGATATTGCTCCATT          |             |
| pygo                                                                                                                                                             | GGGTGGTTCATCATATTTCGG    | TCGGTATCATCGGTAGCCTC          |             |
| lgs                                                                                                                                                              | TCCACATTGCACACTGGTTT     | CAGCGAGTCACAGGCAATAA          |             |
| nkd                                                                                                                                                              | GCGGCCATGTCGAAACC        | CCCTTCGCAACATCTTGAC           |             |
| CK1 $\alpha$                                                                                                                                                     | ACATTTACCTGGGCATGAGC     | ATGTACTIONCCAAGCGTCCGAT       |             |
| opm #1                                                                                                                                                           | AAATGCATCCTCGTTGCTCT     | ACCTGGACATCAGCTTCACC          |             |
| opm #2                                                                                                                                                           | TGGGAATGCCTGGGTTAGT      | ATAGGCACTIONCTGTTTTGCCG       |             |
| syx5                                                                                                                                                             | AGCACGGACTTCAAGCAAAT     | CGCCACATTCGTGTCAATAC          |             |
| dome                                                                                                                                                             | TACAGTTCTGGGTTCTGGG      | GCTCACTIONGGGCTGATAAAGC       |             |
| Hh                                                                                                                                                               | TGACCTTGTAGAGCGCATTG     | GCATCGAGGAGAAGAACCAG          |             |
| <b>qPCR primer sequences</b>                                                                                                                                     |                          |                               |             |
|                                                                                                                                                                  |                          |                               | <b>UPL*</b> |
| rp49                                                                                                                                                             | CGGATCGATATGCTAAGCTGT    | GCGCTTGTTTCGATCCGTA           | 105         |
| opm                                                                                                                                                              | TTACCAATGCAAGCGATCTGG    | CAGAAGTGCTGCGATGGA            | 15          |
| CG5548                                                                                                                                                           | GTGGTGCCACCTTTGAC        | CGATCATCACACGCTCCTT           | 3           |
| dob                                                                                                                                                              | ATTGGTGCCCTCCACAGGT      | CTTACGGTGACGGTGTGCT           | 120         |
| GAPDH                                                                                                                                                            | AGCCACATCGCTCAGACAC      | GCCCAATACGACCAAATCC           | 60          |
| hTMED5                                                                                                                                                           | CTCGCTGGAGATCGAGTACC     | TGTAATCACCAACTIONCTCAGTCTCTAC | 15          |
| <sup>a</sup> Probe Numbers according to Exiqon ProbeLibrary for qPCR.<br><a href="http://www.universalprobelibrary.com">http://www.universalprobelibrary.com</a> |                          |                               |             |
